# Supplementary material for: Supramolecular amphiphiles based on cyclodextrin and hydrophobic drugs
Source: Royal Society of Chemistry journal article supplement (doi:10.1039/c6tb03272a), 2017-01-01
Supplement: c6tb03272a1.pdf [file c6tb03272a1.pdf]

# Supramolecular amphiphiles based on cyclodextrin and hydrophobic drugs

Tao Sun,<sup>a</sup> Qingbing Wang,<sup>b</sup> Yunke Bi,<sup>c</sup> Xinli Chen,<sup>a</sup> Lisha Liu,<sup>a</sup> Chunhui Ruan,<sup>a</sup> Zhifeng Zhao,<sup>a</sup>  
Chen Jiang\*<sup>a</sup>

<sup>a</sup>Key Laboratory of Smart Drug Delivery (Ministry of Education), State Key Laboratory of Medical Neurobiology, Department of Pharmaceutics, School of Pharmacy, Fudan University, 826 Zhangheng Road, Shanghai 201203, P. R. China

<sup>b</sup>Department of Chemistry, Fudan University, 220 Handan Road, Shanghai 200433, P. R. China

<sup>c</sup>Department of Neurosurgery, Shanghai First People's Hospital, School of Medicine, Shanghai Jiao Tong University, 100 Haining Road, Shanghai 201620, P. R. China

## Electronic Supporting Information Table of Contents

|                                              |      |
|----------------------------------------------|------|
| 1. Synthesis.....                            | Page |
| S2                                           |      |
| 2. Supporting results.....                   | Page |
| S11                                          |      |
| 3. Characterizations of all compounds .....  | Page |
| S26                                          |      |
| 4. References of supporting information..... | Page |
| S45                                          |      |

## 1. Synthesis

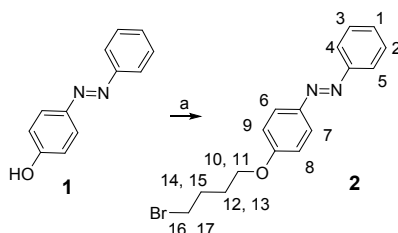

Compound **2**: Compounds **2** and **3** were synthesized in a similar way as reported.<sup>1</sup> *p*-Hydroxyazobenzene (1.98 g, 10 mmol, 1 eq), 1,4-dibromobutane (7.1 mL, 60 mmol, 6 eq) and KOH (1.12 g, 20 mmol, 2 eq) in EtOH (150 mL) was refluxed under an atmosphere of N<sub>2</sub> for 12 h. After cooling down to r.t., the solvent was removed by a rotavapor. The residue was suspended in dichloromethane (DCM, 100 mL) and the solid was filtered off. DCM was removed *in vacuo* and the crude product was purified by a flash column chromatography (SiO<sub>2</sub>, ethyl acetate/petroleum ether (PE), from 1/10 to 1/5 v/v). **2** (1.50 g, 45%) was obtained as a brown powder.

R<sub>f</sub> = 0.9 (ethyl acetate/PE, 1/8 v/v); <sup>1</sup>H NMR (400 MHz, CDCl<sub>3</sub>, δ, ppm): 7.92 (d, J = 8.8 Hz, 2H, H-4, 5), 7.88 (d, J = 7.6 Hz, 2H, H-6, 7), 7.51 (t, J = 7.6 Hz, 2H, H-2, 3), 7.45 (dd, J<sub>1</sub> = 6.0 Hz, J<sub>2</sub> = 7.6 Hz, 1H, H-1), 7.01 (d, J = 8.8 Hz, 2H, H-8, 9), 4.09 (t, J = 6.4 Hz, 2H, H-10, 11), 3.51 (t, J = 6.4 Hz, 2H, H-16, 17), 2.09 (m, 2H, H-14, 15), 2.00 (m, 2H, H-12, 13); <sup>13</sup>C NMR (150 MHz, CDCl<sub>3</sub>, δ, ppm): 160.8, 152.1, 146.3, 129.8 (2C), 128.4 (2C), 124.2 (2C), 121.9 (2C), 66.6, 32.7, 28.8, 27.2; MS-ESI Calc. for C<sub>16</sub>H<sub>18</sub>BrN<sub>2</sub>O [M+H]<sup>+</sup> 333.1 (100%) and 335.1 (97%), Found, 333.0 (100%) and 335.0 (97%); IR (ν<sub>cm<sup>-1</sup></sub>): 2880.0 (m, ν<sub>CH<sub>2</sub>-O-Ar</sub>), 1605.2 (vs, ν<sub>N=N</sub>), 1258.2 (s, w<sub>CH<sub>2</sub>-S</sub>), 776.4 (m, ν<sub>CH</sub>), 689.7 (s, ν<sub>C-Br</sub>).

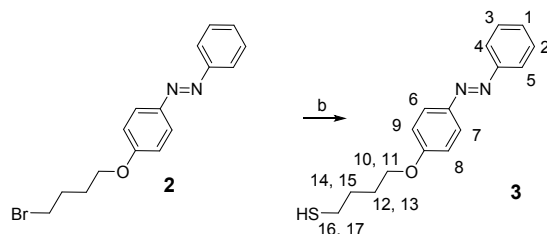

Compound **3**: A solution of **2** (0.19 g, 0.57 mmol, 1 eq) and thiourea (0.22 g, 2.89 mmol, 5 eq) in EtOH (10 mL) was heated under reflux for 12 h. After cooling down to r.t., a solution of KOH (0.19 g, 3.47 mmol) in H<sub>2</sub>O (10 mL) was then added into the above solution, refluxed for another 3 h under N<sub>2</sub> and cooled down to r.t.. The mixture was acidified by HCl (1N) to pH = 1 and extracted

by Et<sub>2</sub>O (30 mL × 3). Organics were combined and washed with brine, dried over Na<sub>2</sub>SO<sub>4</sub>. The solvent was removed *in vacuo* and the crude product was purified by a flash column chromatography (SiO<sub>2</sub>, ethyl acetate/PE, 1/5 v/v). **3** (0.12 g, 75%) was obtained as a brown oil.

R<sub>f</sub> = 0.8 (ethyl acetate/PE, 1/5 v/v); <sup>1</sup>H NMR (400 MHz, CDCl<sub>3</sub>, δ, ppm): 7.92 (d, J = 8.8 Hz, 2H, H-4,5), 7.88 (d, J = 7.6 Hz, 2H, H-6, 7), 7.51 (t, J = 7.6 Hz, 2H, H-2, 3), 7.45 (dd, J<sub>1</sub> = 6.0 Hz, J<sub>2</sub> = 7.6 Hz, 1H, H-1), 7.00 (d, J = 8.8 Hz, 2H, H-8, 9), 4.07 (t, J = 6.4 Hz, 2H, H-10, 11), 2.64 (dd, J<sub>1</sub> = 6.8 Hz, J<sub>2</sub> = 7.2 Hz, 2H, H-16, 17), 1.95 (m, 2H, H-14, 15), 1.85 (m, 2H, H-12, 13), 1.58 (m, 1H, H-18); <sup>13</sup>C NMR (150 MHz, CDCl<sub>3</sub>, δ, ppm): 161.0, 151.8, 146.1, 129.8, 128.4 (2C), 124.4 (2C), 121.9 (2C), 114.1 (2C), 67.1, 29.9, 27.3, 23.8; MS-ESI Calc. for C<sub>16</sub>H<sub>19</sub>N<sub>2</sub>OS [M+H]<sup>+</sup> 287.1, Found, 287.0; IR (ν<sub>cm<sup>-1</sup></sub>): 2934.3 (vs, ν<sub>CH<sub>2</sub> linking SH</sub>), 2872.3 (m, ν<sub>CH<sub>2</sub>-O-Ar</sub>), 1600.5 (vs, ν<sub>N=N</sub>), 1253.5 (vs, w<sub>CH<sub>2</sub>-s</sub>), 767.1 (m, ν<sub>CH</sub>), 686.6 (m, ν<sub>C-SH</sub>).

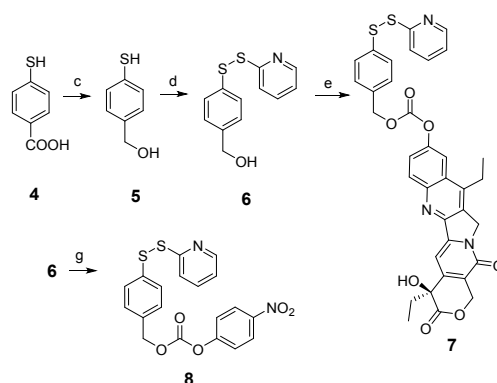

Compound **5**, **6**, **7** and **8** were synthesized based on our previous report.<sup>2</sup> All characterizing spectra of the compounds were in accordance with our previous results.

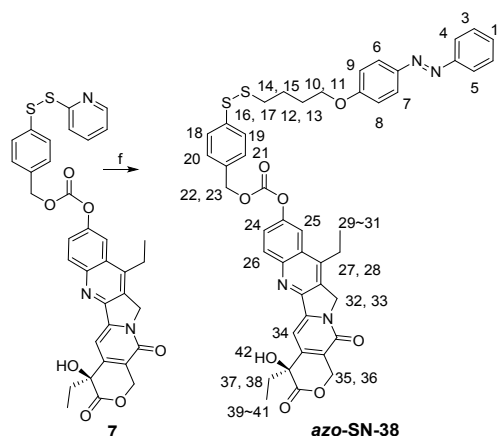

Compound **8**: To a stirred solution of **7** (180 mg, 0.27 mmol, 1.5 eq) in AcOH/EtOH (1/20 v/v, 5 mL, degassed by N<sub>2</sub> for 3 min) at r.t., **3** (51 mg, 0.18 mmol, 1 eq) in AcOH/EtOH (1/20 v/v, 2 mL, degassed with N<sub>2</sub> for 3 min) was injected dropwise over 20 min under an atmosphere of N<sub>2</sub>. The

mixture was allowed to react at r.t. for 12 h. The solvents were then evaporated to dryness *in vacuo*. The resulting residue was subjected to a flash column chromatography (SiO<sub>2</sub>, ethyl acetate/DCM, 1/2 v/v) to afford **azo-SN-38** (55 mg, 36%) as a pale yellowish powder.

R<sub>f</sub> = 0.7 (ethyl acetate/DCM, 1/1 v/v); <sup>1</sup>H NMR (400 MHz, CDCl<sub>3</sub>, δ, ppm): 8.22 (d, J = 9.6 Hz, 1H, H-25), 7.88-7.81 (m, 5H, H-4, 5, 6, 7, 24), 7.65-7.59 (m, 4H, H-18, 19, 26, 34), 7.55-7.53 (m, 1H, H-1), 7.48-7.40 (m, 4H, H-2, 3, 20, 21), 6.95 (d, J = 8.8 Hz, 2H, H-8, 9), 6.74 (s, w, 1H, H-42), 5.74 (d, J = 16.4 Hz, 1H, H-22), 5.30 (d, J = 16.4 Hz, 1H, H-23), 5.30 (s, 2H, H-35, 36), 5.24 (s, 2H, H-32, 33), 4.02-3.99 (m, 2H, H-10, 11), 3.11 (q, J = 8.0 Hz, 2H, H-27, 28), 2.88-2.84 (m, 2H, H-16, 17), 1.98-1.84 (m, 6H, H-12~15, 37, 38), 1.37 (t, 3H, J = 8.0 Hz, H-29~31), 1.03 (t, 3H, J = 8.0 Hz, H-39~41); <sup>13</sup>C NMR (150 MHz, CDCl<sub>3</sub>, δ, ppm): 174.3, 161.7, 158.0, 153.7, 153.0, 152.5, 150.5, 150.2, 147.9, 147.3, 147.2, 145.7, 139.2, 138.1, 133.3, 132.7, 130.7, 130.2, 130.0, 129.8 (2C), 129.4 (2C), 127.9 (2C), 127.7, 125.1 (2C), 122.9 (2C), 119.0, 115.0 (2C), 114.5, 98.4, 732.2, 70.6, 68.0, 66.7, 49.8, 39.0, 32.0, 29.7, 28.2, 27.6, 25.8, 23.5; MS-ESI Calc. for C<sub>46</sub>H<sub>43</sub>N<sub>4</sub>O<sub>8</sub>S<sub>2</sub> [M+H]<sup>+</sup> 843.3, Found, 843.0; IR (ν<sub>cm-1</sub>): 2926.1 (vs, ν<sub>CH2</sub> linking SH), 2854.3 (m, ν<sub>CH2-O-Ar</sub>), 1747.0 (s, br, ν<sub>C=O</sub>), 1695.7 (vs, ν<sub>N=N</sub>), 1216.8 (vs, w<sub>CH2-S</sub>), 1137.4 (w, ν<sub>C-OH</sub>), 758.6 (m, ν<sub>CH</sub>).

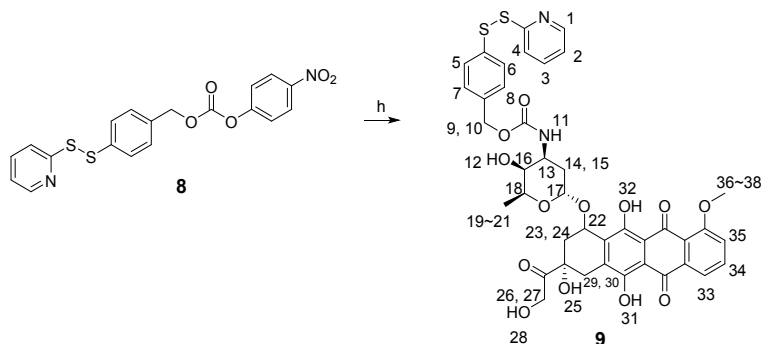

**Compound 10**: To a stirred solution of doxorubicin hydrochloride (**DOX·HCl**, 127 mg, 0.22 mmol, 1 eq) in dry DMF (4 mL, degassed by N<sub>2</sub> for 3 min) in the dark at r.t., Et<sub>3</sub>N (34 mg, 46 μL, 0.33 mmol, 1.5 eq) was added dropwise. The mixture was allowed to react at r.t. for 0.5 h, followed by an injection with **8** (95 mg, 0.23 mmol, 1.05 eq) and trace DMAP in dry DMF (2 mL). The whole mixture was stirred in the dark at r.t. overnight and allowed to precipitate in water. The solid was collected by a filtration and the cake was washed by water and dried over *vacuum*. The crude was further purified by a flash column chromatography (SiO<sub>2</sub>, MeOH/DCM, from 1/50 to 1/10 v/v) to obtain **9** (61 mg, 34%) as a deep-red solid.

R<sub>f</sub> = 0.85 (MeOH/DCM, 1/10 v/v); <sup>1</sup>H NMR (400 MHz, CDCl<sub>3</sub>, δ, ppm): 13.97 (s, 1H, H-32), 13.25



(s, 1H, H-30), 8.44 (d, 1H, J = 4.8 Hz, H-1), 8.05-8.01 (m, 2H, H-3, 4), 8.01 (s, w, 1H, H-11), 7.79 (t, 1H, J = 8.0 Hz, H-34), 7.60 (d, 2H, J = 3.2 Hz, H-5, 6), 7.46 (d, 1H, J = 8.0 Hz, H-33), 7.39 (d, 1H, J = 8.0 Hz, H-35), 7.24 (d, 2H, J = 3.2 Hz, H-7, 8), 7.10-7.08 (m, 1H, H-2), 5.50 (s, 1H, H-12), 5.28 (s, 1H, H-9), 5.18 (s, 1H, H-10), 4.97 (s, 2H, H-26, 27), 4.75 (s, 2H, H-17, 22), 4.17-4.10 (m, 1H, H-16), 4.08 (s, 3H, H-36~38), 4.06 (s, 1H, H-12), 3.85 (s, 1H, H-13), 3.65 (s, 1H, H-18), 3.27 (d, J = 18.4 Hz, 1H, H-28), 3.05-3.00 (m, 2H, H-29, 30), 2.34-2.14 (m, 2H, H-23, 24), 1.88-1.79 (m, 2H, H-14, 15), 1.268 (t, 3H, H-19~21); <sup>13</sup>C NMR (150 MHz, CDCl<sub>3</sub>, δ, ppm): 213.2, 186.5, 186.1, 180.5, 158.8, 155.6, 155.1, 154.7, 148.7, 136.9, 135.3, 135.2, 134.9, 134.8, 132.9, 128.4, 128.3, 127.0, 126.9 (2C), 120.4, 120.3, 119.2 (2C), 117.9, 111.0, 110.8, 100.1, 69.1, 68.9, 66.6, 65.4, 64.9, 56.1, 46.4, 35.0, 33.4, 29.6, 29.1, 16.2; MS-ESI Calc. for C<sub>40</sub>H<sub>39</sub>N<sub>2</sub>O<sub>13</sub>S<sub>2</sub> [M+H]<sup>+</sup> 819.2, Found, 819.0; C<sub>40</sub>H<sub>38</sub>N<sub>2</sub>NaO<sub>13</sub>S<sub>2</sub> [M+Na]<sup>+</sup> 841.2, Found, 841.0.

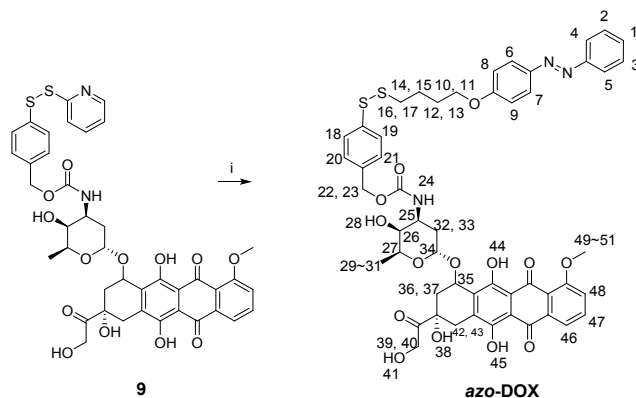

Compound **8**: In the dark, **3** (32 mg, 0.11 mmol, 1.1 eq), **9** (82 mg, 0.1 mmol, 1 eq) and trace DMAP in dry DCM were stirred overnight at r.t. under Ar. The solvents were then evaporated to dryness *in vacuo*. The resulting residue was subjected to a prep-TLC plate (SiO<sub>2</sub> on glass, MeOH/DCM, 1/20 v/v) to afford **azo-DOX** (37 mg, 37%) as a deep red powder.

R<sub>f</sub> = 0.2 (MeOH/DCM, 1/20 v/v); <sup>1</sup>H NMR (400 MHz, CDCl<sub>3</sub>, δ, ppm): 13.99 (s, 1H, H-44), 13.29 (s, 1H, H-45), 8.15 (d, 2H, J = 9.2 Hz, H-4, 5), 8.02 (s, w, 1H, H-24), 7.92-7.86 (m, 4H, H-6, 7, 46, 47), 7.58-7.53 (m, 4H, H-2, 3, 18, 19), 7.40-7.36 (m, 3H, H-20, 21), 7.01-6.96 (m, 1H, H-48), 6.91 (d, 2H, J = 9.2 Hz, H-8, 9), 6.75 (t, 1H, J = 6.4 Hz, H-1), 5.34 (t, 1H, J = 4.4 Hz, H-28), 5.00-4.99 (m, 1H, H-22), 4.77-4.75 (m, 1H, H-23), 4.13-4.04 (m, 4H, H-10, 11, 38, 41), 3.49 (s, 2H, H-39, 40), 2.96 (s, 3H, H-49~51), 2.91-2.90 (m, 3H, H-26, 42, 43), 2.81-2.78 (m, 2H, H-16, 17), 2.42-2.37 (m, 1H, H-25, 27), 2.25-2.20 (m, 2H, H-34, 35), 2.10 (s, 2H, H-32, 33), 1.95-1.93 (m, 2H, H-12, 13), 1.90-1.85 (m, 2H, H-36, 37), 1.18-1.15 (m, 3H, H-29~31), 0.88-0.86 (m, 2H, H-14, 15); MS-

ESI Calc. for  $C_{51}H_{52}N_3O_{14}S_2$   $[M+H]^+$  994.3, Found, 994.2;  $C_{51}H_{51}N_3NaO_{14}S_2$   $[M+Na]^+$  1016.3, Found, 1016.2; IR ( $\nu_{cm^{-1}}$ ): 2921.6 (vs,  $\nu_{CH_2}$  linking disulfide), 2845.2 (m,  $\nu_{CH_2-O-Ar}$ ), 1719.4 (w, br,  $\nu_{C=O}$ ), 1555.9 (vs,  $\nu_{N=N}$ ), 1106.0 (vs,  $w_{CH_2}$ ), 799.8 (m,  $\nu_{CH}$ ).

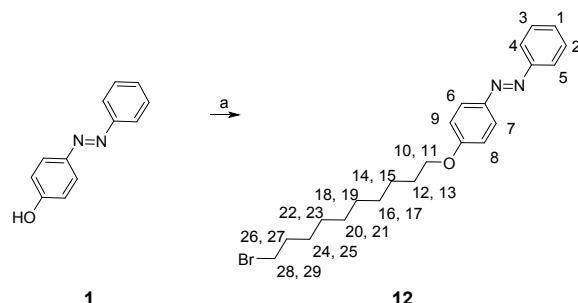

Compound **12**: *p*-Hydroxyazobenzene (0.99 g, 5 mmol, 1 eq), 1,4-dibromobutane (9 g, 30 mmol, 6 eq) and KOH (0.56 g, 10 mmol, 2 eq) in absolute EtOH (100 mL) was refluxed under an atmosphere of  $N_2$  for 12 h. After cooling down to r.t., the solvent was removed by a rotavapor. The residue was suspended in dichloromethane (DCM, 100 mL) and the solid was filtered off. DCM was removed *in vacuo* and the crude product was purified by a flash column chromatography ( $SiO_2$ , ethyl acetate/PE, from 1/10 to 1/4 v/v). **12** (811 mg, 39%) was obtained as a brown powder.  $R_f$  = 0.8 (ethyl acetate/PE, 1/8 v/v);  $^1H$  NMR (400 MHz,  $CDCl_3$ ,  $\delta$ , ppm): 7.92 (d,  $J$  = 8.8 Hz, 2H, H-4, 5), 7.89 (d,  $J$  = 7.6 Hz, 2H, H-6, 7), 7.50 (t,  $J$  = 7.6 Hz, 2H, H-2, 3), 7.44 (dd,  $J_1$  = 6.0 Hz,  $J_2$  = 7.6 Hz, 1H, H-1), 7.00 (d,  $J$  = 8.8 Hz, 2H, H-8, 9), 4.04 (t,  $J$  = 6.4 Hz, 2H, H-10, 11), 3.48 (t,  $J$  = 6.4 Hz, 2H, H-28, 29), 3.41-3.36 (m, 4H, H-12, 13, 26, 27), 1.86-1.83 (m, 4H, H-14, 15, 24, 25), 1.66-1.40 (m, 6H, H-16~19, H-22, 23), 1.23-1.13 (m, 2H, H-20, 21).  $^{13}C$  NMR (150 MHz,  $CDCl_3$ ,  $\delta$ , ppm): 161.9, 153.0, 147.0, 130.4, 129.2 (2C), 124.9 (2C), 122.7 (2C), 114.9 (2C), 70.9, 68.5, 66.2, 34.2, 33.0, 29.6, 29.3, 28.9, 28.3, 26.2; MS-ESI Calc. for  $C_{22}H_{30}BrN_2O$   $[M+H]^+$  417.2 (100%) and 419.2 (97%), Found, 417.2 (100%) and 419.0 (97%); IR ( $\nu_{cm^{-1}}$ ): 2845.0 (vs,  $\nu_{CH_2-O-Ar}$ ), 1604.8 (m,  $\nu_{N=N}$ ), 1258.1 (s,  $w_{CH_2-S}$ ), 884.1 (m,  $\nu_{CH}$ ), 688.3 (s,  $\nu_{C-Br}$ ).

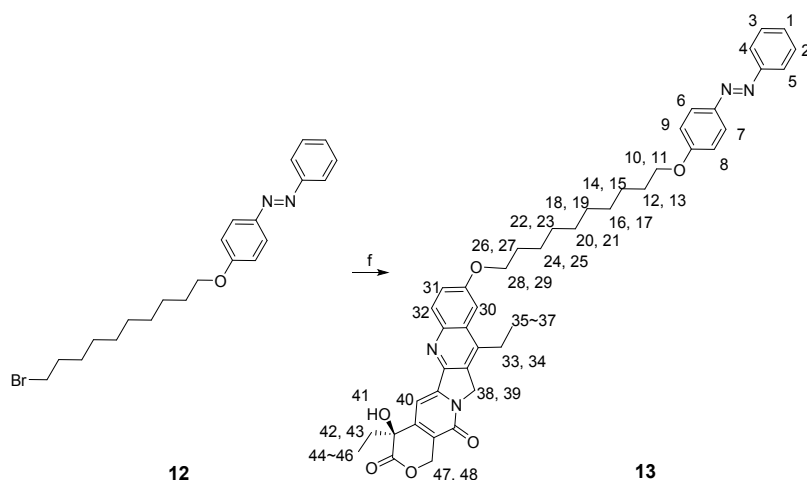

Compound **13**: SN-38 (392.2 mg, 1 mmol, 1 eq) and dry DMSO (1.5 mL) was stirred at r.t. until it was dissolved completely. Then **12** (2.5 g, 6 mmol, 6 eq) and  $K_2CO_3$  (700 mg, 5 mmol, 5 eq) were added. The whole suspension was stirred at r.t. in the dark under  $N_2$  for 6 h and monitored by TLC. The mixture was then poured into  $Et_2O$ . The precipitation was filtered, the cake was washed by  $Et_2O$  and air-dried. The crude product was further purified by a flash column chromatography ( $SiO_2$ , ethyl acetate/DCM, from 1/20 to 1/3 v/v) to obtain **13** (561 mg, 77%) as a brown solid.

$R_f = 0.2$  (ethyl acetate/DCM, 1/4 v/v);  $^1H$  NMR (400 MHz,  $CDCl_3$ ,  $\delta$ , ppm): 8.09 (d,  $J = 9.2$  Hz, 2H, H-4, 5), 7.87-7.81 (m, 1H, H-32), 7.68-7.60 (m, 2H, H-2, 3), 7.45 (t,  $J = 6.4$  Hz, 1H, H-1), 7.38-7.35 (m, 3H, H-6, 7, 30), 7.18-7.14 (m, 3H, H-8, 9, 31), 6.95 (d,  $J = 6.8$  Hz, 1H, H-40), 5.68 (d,  $J = 16.0$  Hz, 2H, H-28, 29), 5.24 (d,  $J = 16.0$  Hz, 2H, H-10, 11), 5.16-5.10 (m, 4H, H-38, 39, 47, 48), 4.56-4.43 (s, 1H, H-41), 3.50 (q,  $J = 5.2$  Hz, 2H, H-33, 34), 3.30 (q,  $J = 2.4$  Hz, 2H, H-42, 43), 3.16-3.03 (m, 4H, H-12, 13, 26, 27), 1.56-1.52 (m, 7H, H-14, 15, 24, 25, 35~37), 0.99-0.95 (m, 11H, H-16~23, 44~46);  $^{13}C$  NMR (150 MHz,  $CDCl_3$ ,  $\delta$ , ppm): 173.4, 161.0, 157.9, 157.1, 152.2, 149.6, 146.3, 131.2, 129.7, 128.4, 128.3, 127.7 (2C), 126.6, 126.2, 124.1, 123.2 (2C), 122.3, 121.9, 119.1 (2C), 117.2, 114.1 (2C), 113.5, 101.8, 97.0, 72.2, 67.9, 67.7, 65.8, 48.8, 31.0, 29.2, 28.7 (2C), 28.6, 25.6, 25.5, 23.4, 22.6, 13.0, 7.2; MS-ESI Calc. for  $C_{44}H_{49}N_4O_6$   $[M+H]^+$  729.4, Found, 729.4; IR ( $\nu_{cm^{-1}}$ ): 2854.4 (m,  $\nu_{CH_2-O-Ar}$ ), 1742.3 (s, br,  $\nu_{C=O}$ ), 1600.2 (vs,  $\nu_{N=N}$ ), 1248.9 (vs,  $\nu_{CH_2-S}$ ), 1146.6 (w,  $\nu_{C-OH}$ ), 834.9 (m,  $\nu_{CH}$ ).

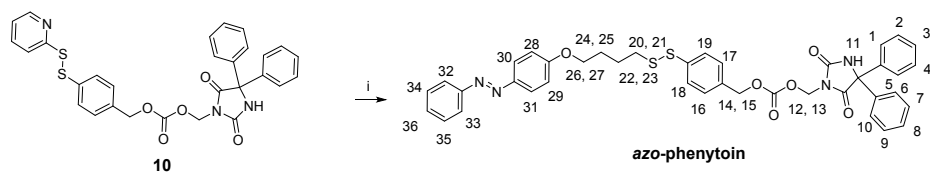

Compound **azo-phenytoin**: Compound **10** was synthesized based on our previous report.<sup>2</sup> All characterizing spectra of the compound were in accordance with our previous results. Then in the dark, **10** (18 mg, 0.032 mmol, 1.1 eq), **3** (10 mg, 0.032 mmol, 1 eq) and trace DMAP in dry DCM were stirred overnight at r.t. under N<sub>2</sub>. The solvents were then evaporated to dryness *in vacuo*. The resulting residue was subjected to a flash column chromatography (SiO<sub>2</sub>, DCM) to afford **azo-phenytoin** (37 mg, 37%) as a deep red powder.

R<sub>f</sub> = 0.5 (DCM); <sup>1</sup>H NMR (400 MHz, CDCl<sub>3</sub>, δ, ppm): 7.92-7.87 (m, 4H, H-30~33), 7.84-7.48 (m, 4H, H-18, 19, 34, 35), 7.47-7.42 (q, 1H, J = 8.0 Hz, H-36), 7.37-7.32 (m, 12H, H-1~10, 16, 17), 7.00-6.94 (d, 2H, H-28, 29), 6.81 (s, w, 1H, H-11), 5.63 (s, 2H, H-12, 13), 5.14 (s, 2H, H-14, 15), 4.05-3.98 (m, 2H, H-26, 27), 2.84-2.79 (m, 2H, H-20, 21), 1.93-1.84 (m, 4H, H-22~25); <sup>13</sup>C NMR (150 MHz, CDCl<sub>3</sub>, δ, ppm): 175.5, 172.2, 161.6, 154.5, 153.6, 152.9, 147.1, 138.5 (2C), 133.4, 130.5, 129.4 (2C), 129.2 (2C), 129.1 (4C), 129.0 (2C), 127.6 (2C), 126.9 (4C), 124.9 (2C), 122.7 (2C), 114.9 (2C), 70.5, 69.8, 67.8, 64.6, 38.5, 28.1, 25.5. MS-ESI Calc. for C<sub>40</sub>H<sub>37</sub>N<sub>4</sub>O<sub>6</sub>S<sub>2</sub> [M+H]<sup>+</sup> 733.2, Found, 733.2; C<sub>40</sub>H<sub>35</sub>N<sub>4</sub>NaO<sub>6</sub>S<sub>2</sub> [M+Na]<sup>+</sup> 755.2, Found, 755.2; IR (ν<sub>cm-1</sub>): 2923.8 (vs, ν<sub>CH2</sub> linking disulfide), 2844.4 (m, ν<sub>CH2-O-Ar</sub>), 1733.0 (w, br, ν<sub>C=O</sub>), 1508.4 (m, ν<sub>N=N</sub>), 1136.6 (vs, w<sub>CH2</sub>), 770.7 (m, ν<sub>CH</sub>).

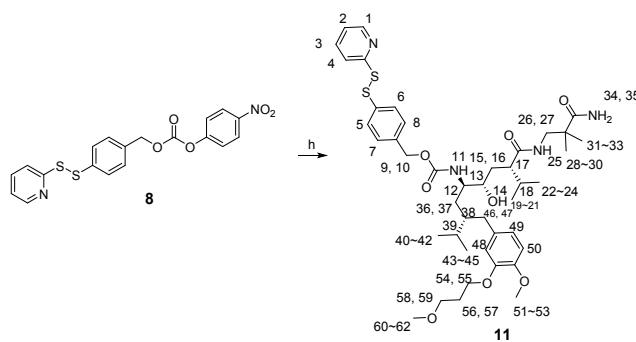

Compound **10**: To a stirred solution of aliskiren hemifumarate (121 mg, 0.22 mmol, 1 eq) in dry DMF (4 mL, degassed by N<sub>2</sub> for 3 min) in the dark at r.t., Et<sub>3</sub>N (34 mg, 46 μL, 0.33 mmol, 1.5 eq) was added dropwise. The mixture was allowed to react at r.t. for 0.5 h, followed by an injection with **8** (95 mg, 0.23 mmol, 1.05 eq) and trace DMAP in dry DMF (2 mL). The whole mixture was stirred in the dark at r.t. overnight and allowed to precipitate in water. The solid was collected by a filtration and the cake was washed by water and dried over *vacuum*. The crude was further purified by a flash column chromatography (SiO<sub>2</sub>, MeOH/DCM, from 1/50 to 1/10 v/v) to obtain **11** (67 mg, 37%) as a white solid.

R<sub>f</sub> = 0.80 (MeOH/DCM, 1/10 v/v); <sup>1</sup>H NMR (400 MHz, CDCl<sub>3</sub>, δ, ppm): 8.39 (d, 1H, J = 4.8 Hz, H-1), 7.72-7.64 (m, 2H, H-3, 4), 7.46 (d, 2H, J = 8.0 Hz, H-5, 6), 7.35 (d, 2H, J = 8.0 Hz, H-5, 6), 7.23-7.19 (m, 1H, H-2), 6.78-6.76 (m, 2H, H-49, 50), 6.59 (d, 1H, J = 9.2 Hz, H-48), 5.07 (dd, 2H, J<sub>1</sub> = 9.2 Hz, J<sub>2</sub> = 18.4 Hz, H-9, 10), 4.21 (dd, 1H, J<sub>1</sub> = 5.2 Hz, J<sub>2</sub> = 1.6 Hz, H-13), 4.01-3.96 (m, 2H, H-54, 55), 3.80 (s, 3H, H-51~53), 3.65-3.60 (m, 1H, H-25), 3.53 (t, 2H, J = 6.0 Hz, H-58, 59), 3.35-3.30 (m, 6H, H-12, 26, 27, 60~62), 2.48 (dd, 2H, J<sub>1</sub> = 128.8 Hz, J<sub>2</sub> = 13.6 Hz, H-46, 47), 2.26-2.21 (m, 1H, H-17), 1.96 (t, 1H, J = 6.0 Hz, H-18), 1.73-1.63 (m, 2H, H-56, 57), 1.58-1.44 (m, 3H, H-15, 16, 38), 1.37-1.28 (m, 3H, H-36, 37, 39), 1.18 (s, 3H, H-28~30), 1.17 (s, 3H, H-31~33), 0.92-0.88 (m, 6H, H-19~24), 0.78 (d, 3H, J = 6.8 Hz, H-40~42), 0.72 (d, 3H, J = 7.6 Hz, H-43~45); MS-ESI Calc. for C<sub>43</sub>H<sub>63</sub>N<sub>4</sub>O<sub>8</sub>S<sub>2</sub> [M+H]<sup>+</sup> 827.4, Found, 827.4; C<sub>43</sub>H<sub>62</sub>N<sub>4</sub>NaO<sub>8</sub>S<sub>2</sub> [M+Na]<sup>+</sup> 851.4, Found, 851.4.

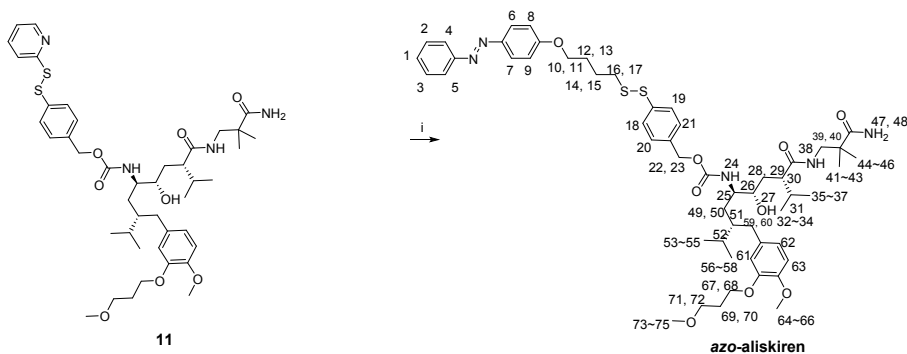

Compound **azo-aliskiren**: In the dark, **11** (26 mg, 0.032 mmol, 1.1 eq), **3** (10 mg, 0.032 mmol, 1 eq) and trace DMAP in dry DCM were stirred overnight at r.t. under N<sub>2</sub>. The solvents were then evaporated to dryness *in vacuo*. The resulting residue was subjected to a flash column chromatography (SiO<sub>2</sub>, MeOH/DCM, from 1/50 to 1/10 v/v) to afford **azo-aliskiren** (11 mg, 34%) as a pink powder.

R<sub>f</sub> = 0.60 (MeOH/DCM, 1/10 v/v); <sup>1</sup>H NMR (400 MHz, CDCl<sub>3</sub>, δ, ppm): 7.91-7.85 (m, 4H, H-5~7), 7.51-7.47 (m, 4H, H-2, H-3, H-18, H-19), 7.43 (q, 1H, J = 8.4 Hz, H-1), 7.30 (d, 2H, J = 8.4 Hz, H-20, 21), 6.96 (d, 2H, J = 8.4 Hz, H-8, 9), 6.77-6.73 (m, 2H, H-62, 63), 7.65-7.63 (m, 1H, H-61), 6.13 (w, s, 1H, H-38), 5.84 (w, s, 1H, H-24), 5.13-4.99 (m, 2H, H-22, 23), 5.07 (w, s, 2H, H-47, 48), 4.14-3.99 (m, 5H, H-10, 11, 26, 67, 68), 3.82 (s, 3H, H-64~66), 3.57-3.53 (m, 2H, H-71, 72), 3.47-3.42 (m, 1H, H-25), 3.31 (s, 3H, H-73~75), 3.30-3.24 (m, 2H, H-39, 40), 2.80-2.77 (m, 2H, H-16, 17), 2.44 (dd, 2H, J<sub>1</sub> = 89 Hz, J<sub>2</sub> = 9.6 Hz, H-59, 60), 2.09-2.00 (m, 5H, H-12~15, 31), 1.90-1.88 (m, 2H, H-69, 70), 1.68-1.52 (m, 3H, H-28, 29, 51), 1.27-1.23 (m, 3H, H-49, 50, 52), 1.19 (s,

3H, H-41~43), 1.18 (s, 3H, H-44~46), 0.90-0.86 (m, 6H, H-32~37), 0.82-0.76 (m, 6H, H-53~58); MS-ESI Calc. for  $C_{54}H_{76}N_5O_9S_2$   $[M+H]^+$  1002.5, Found, 1002.4;  $C_{54}H_{75}N_5NaO_9S_2$   $[M+Na]^+$  1024.5, Found, 1024.4; IR ( $\nu_{cm^{-1}}$ ): 2918.7 (vs,  $\nu_{CH_2}$  linking disulfide), 2870.5 (m,  $\nu_{CH_2-O-Ar}$ ), 1650.6 (w, br,  $\nu_{C=O}$ ), 1510.5 (m,  $\nu_{N=N}$ ), 1147.6 (vs,  $w_{CH_2}$ ), 804.2 (m,  $\nu_{CH}$ ).

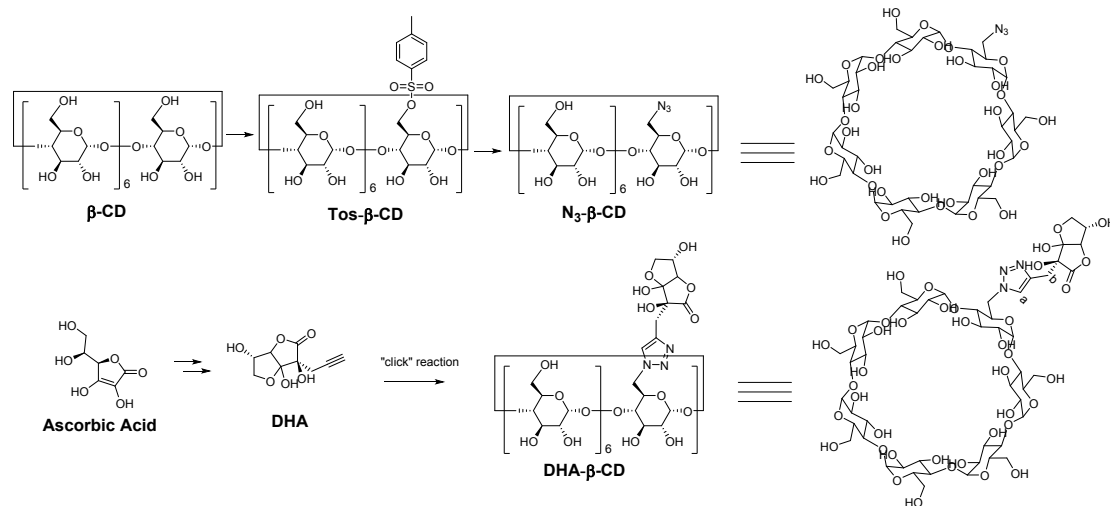

Compound **DHA-β-CD**: **N<sub>3</sub>-β-CD** was prepared followed by reported procedures.<sup>3</sup> DHA was synthesized from ascorbic acid as reported in our previous work.<sup>4</sup> DHA (538 mg, 2.5 mmol, 5 eq), **N<sub>3</sub>-β-CD** (580 mg, 0.5 mmol, 1 eq), *L*-ascorbic acid sodium salt (200 mg, 1 mmol, 2 eq) and  $CuSO_4 \cdot 5H_2O$  (6.25 mg, 0.025 mmol, 0.05 eq) were suspended in DMF (anhydrous, 2 mL) and allowed to react under  $N_2$  at dark for 12 h. The mixture was then precipitated in acetone and the yielded yellowish solid was collected by filtration, dissolved in  $H_2O$  (5 mL), dialyzed against EDTA (10 mM in 20 mM PBS 7.4 solution,  $3 \times 200$  mL) and then  $H_2O$  ( $3 \times 2$  L), freeze dried to obtain **DHA-β-CD** (653 mg, 95%) as a yellowish solid.

$R_f = 0.50$  (isopropanol/ $H_2O/NH_3 \cdot H_2O$ , 5/2/1 v/v, iodine treated);  $^1H$  NMR (600 MHz,  $D_2O$ ,  $\delta$ , ppm): 8.16 (s, 1H, H-a), 5.62 (dd,  $J_1 = 44$  Hz,  $J_2 = 12$  Hz, 2H), 5.18-5.13 (m, 1H), 5.03-4.99 (m, 7H, H-1 of  $\beta$ -CD), 4.67-4.62 (m, 1H), 3.95-3.88 (m, 7H, H-3 of  $\beta$ -CD), 3.85-3.73 (m, 21H, H-5 and H-6 of  $\beta$ -CD), 3.68-3.49 (m, 14H, H-2 and H-4 of  $\beta$ -CD), 2.95 (dd,  $J_1 = 180$  Hz,  $J_2 = 12$  Hz, 2H), MS-ESI Calc. for  $C_{51}H_{80}N_3O_{40}$   $[M+H]^+$  1374.4, Found, 1374.4;  $C_{51}H_{79}N_3NaO_{40}$   $[M+Na]^+$  1396.4, Found, 1396.4; IR ( $\nu_{cm^{-1}}$ ): 3378.8 (vs,  $\nu_{OH}$ ), 2932.2 (m,  $\nu_{CH_2-O-CH_2}$ ), 2347.2 (w,  $\nu_{C=N}$ ), 1637.7 (m, br,  $\nu_{C=O}$ ), 1248.9 (vs,  $w_{CH_2-S}$ ), 1146.6 (w,  $\nu_{C-OH}$ ), 834.9 (m,  $\nu_{CH}$ ).

## 2. Supporting results

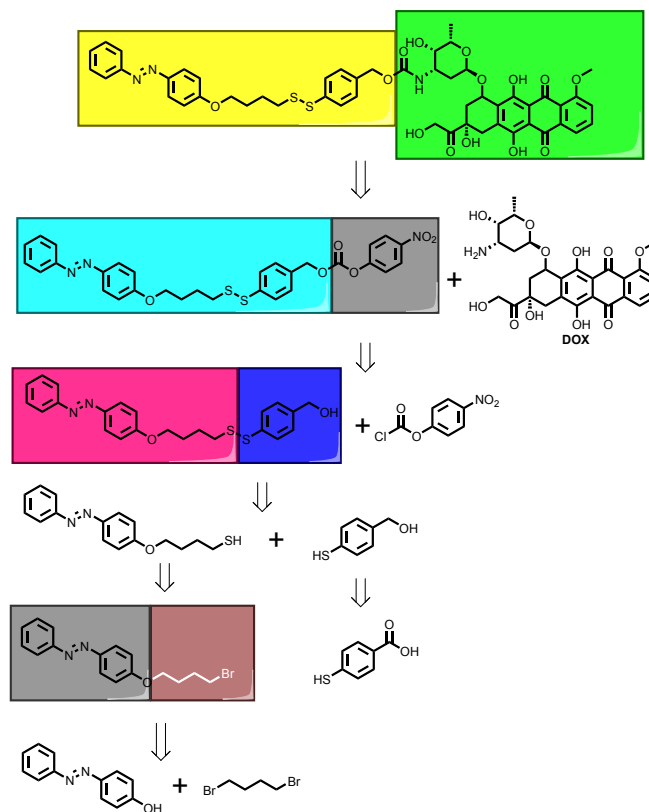

**Figure S1.** Retrosynthesis analysis of the guested prodrug molecule with compound *azo-DOX* as the example.

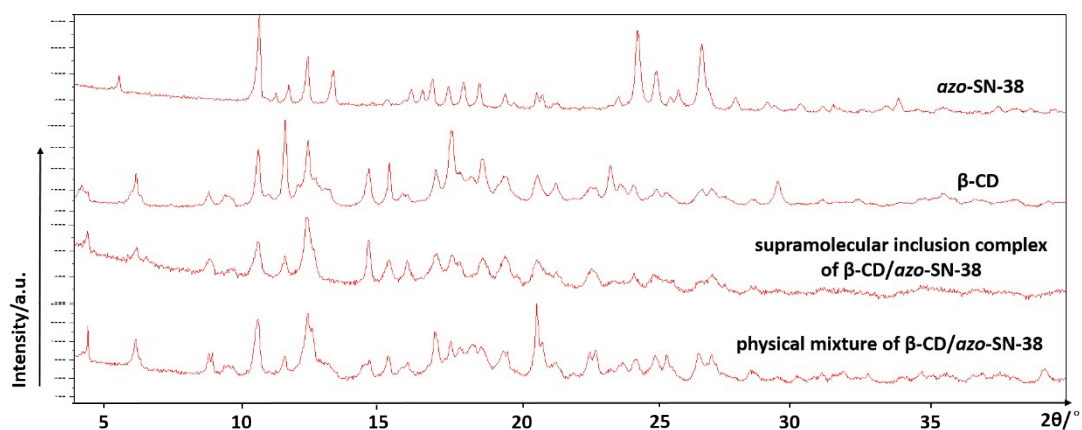

**Figure S2.** The comparison of the XRD spectra of  $\beta$ -CD, *azo-SN-38*, their physical mixture, and inclusion complex at 300 K.

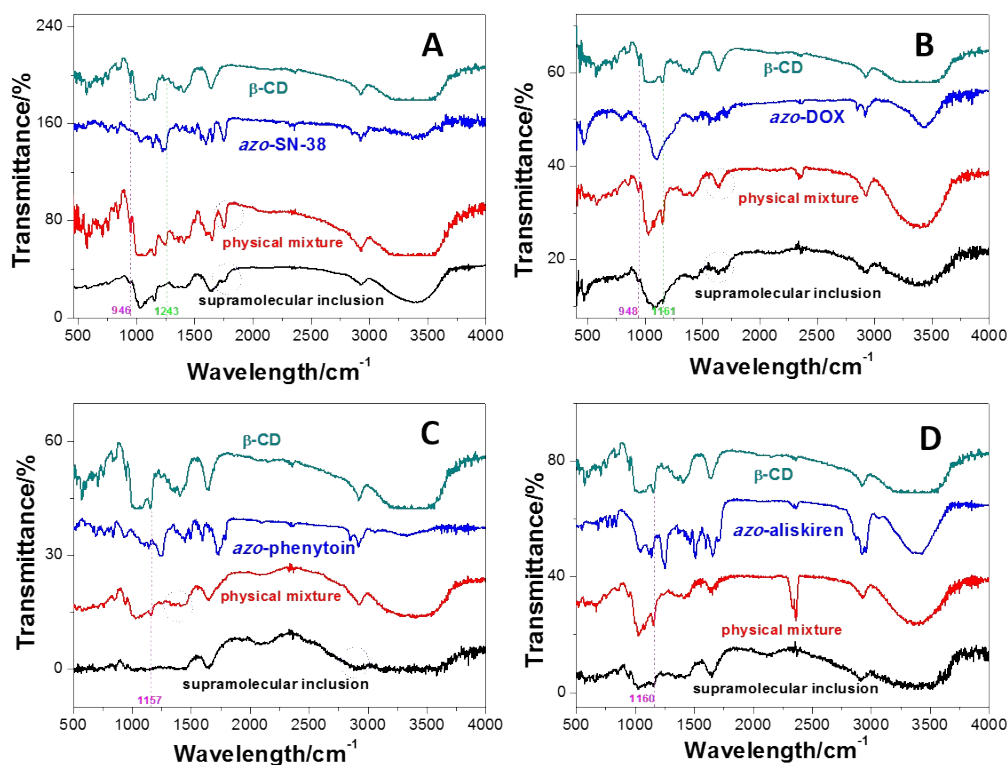

**Figure S3.** The comparison of the FTIR spectra in KBr capsules at 300 K. (A):  $\beta$ -CD, *azo-SN-38*, their physical mixture, and inclusion complex. Intensity change at peak  $946\text{ cm}^{-1}$  (purple line)/ $1243\text{ cm}^{-1}$  (green line) and shape change in the blue circle; (B):  $\beta$ -CD, *azo-DOX*, their physical mixture, and inclusion complex. Intensity change at peak  $948\text{ cm}^{-1}$  (purple line)/ $1161\text{ cm}^{-1}$  (green line) and shape change in the blue circle. (C):  $\beta$ -CD, *azo-phenytoin*, their physical mixture, and inclusion complex. Intensity change at peak  $1157\text{ cm}^{-1}$  (purple line) and shape change in the blue circle; (D):  $\beta$ -CD, *azo-aliskiren*, their physical mixture, and inclusion complex. Intensity change at peak  $1160\text{ cm}^{-1}$  (purple line). Wider peaks can be found around  $3300\text{ cm}^{-1}$ , suggesting the formation of hydrogen bonds



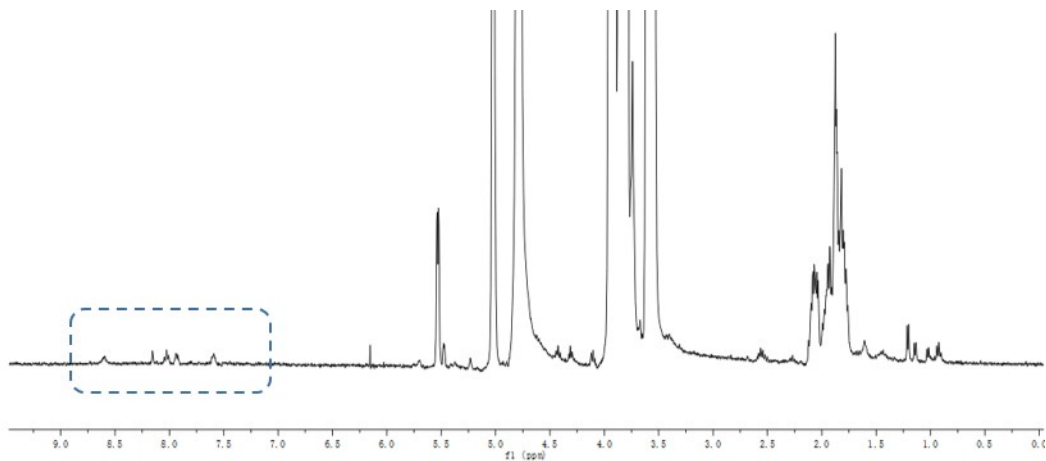

**Figure S4.**  $^1\text{H}$  NMR spectrum of  $\beta\text{-CD}/\text{azo-SN-38}$  in  $\text{D}_2\text{O}$  at ambient temperature. Clear peaks belonging to *azo-SN-38* can be detected as shown in the blue box.

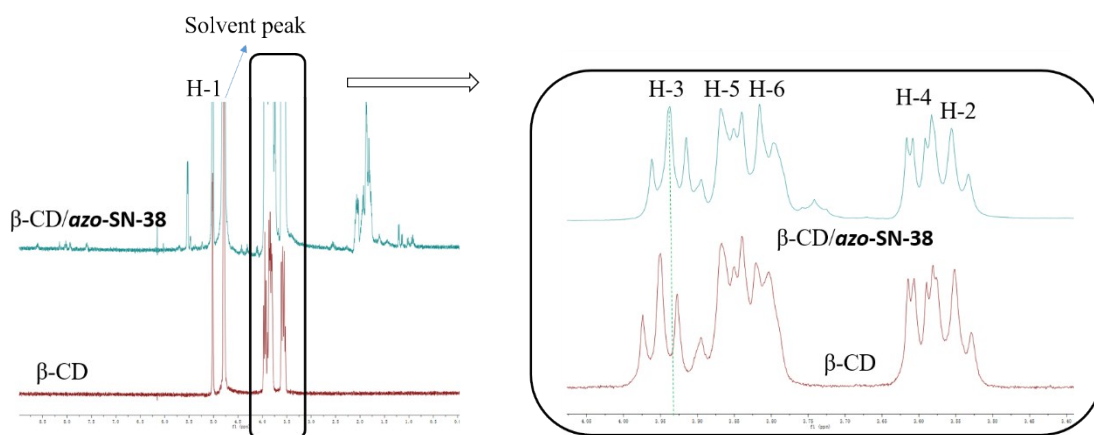

**Figure S5.** Comparison of  $^1\text{H}$  NMR spectra of  $\beta\text{-CD}$  and  $\beta\text{-CD}/\text{azo-SN-38}$  in  $\text{D}_2\text{O}$  at ambient temperature. Clear chemical shift of H-3 before and after the inclusion was detected.

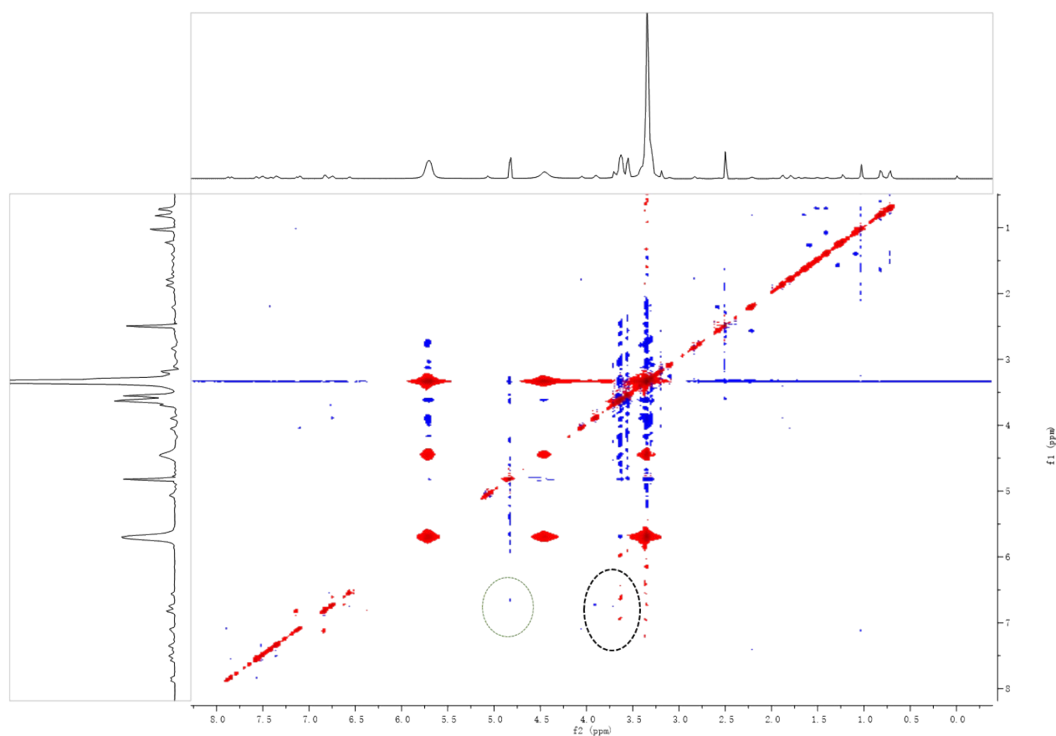

**Figure S6.** 2D NMR ROESY (600 MHz) spectrum of  $\beta$ -CD/*azo*-SN-38 in DMSO- $\delta_6$  at  $T = 300$  K. The solubility of  $\beta$ -CD/*azo*-SN-38 in  $D_2O$  is too low to show the NMR peaks, and DMSO- $\delta_6$  was used instead. Green circle: interactions between *azo*-SN-38 and H-1; black circle: interactions between *azo*-SN-38 and H-3.

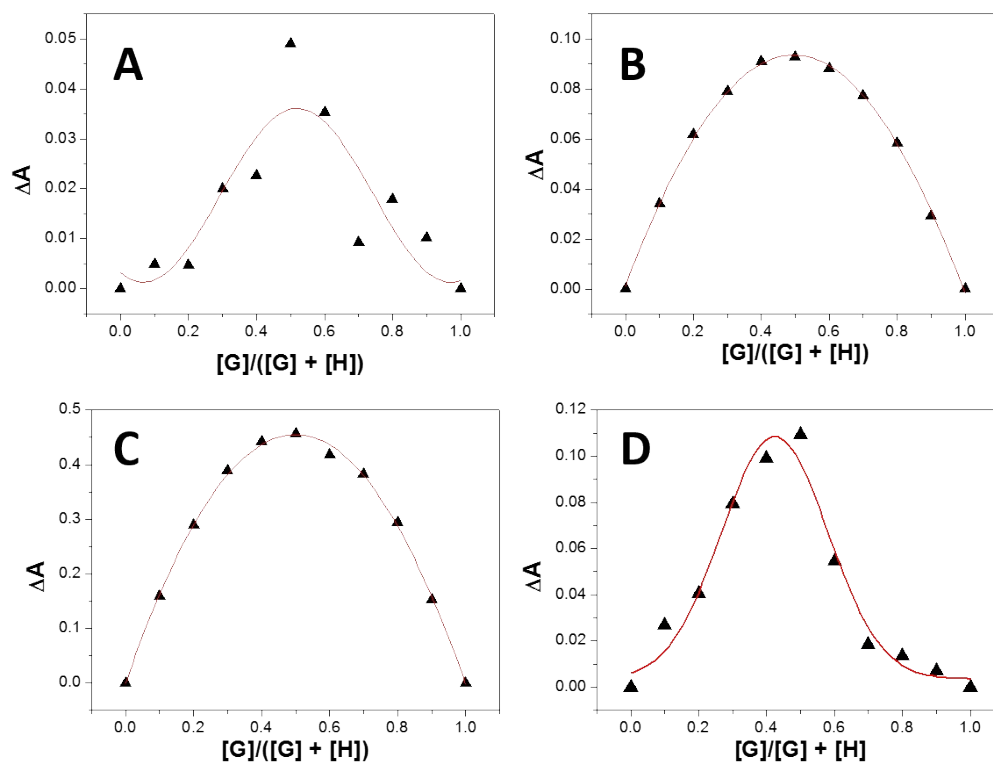

**Figure S7.** Job's plots by UV-vis for the binding stoichiometry of  $\beta$ -CD with compound *azo-SN-38* (A), *azo-DOX* (B), *azo-phenytoin* (C) and *azo-aliskiren* (D) in water at room temperature.

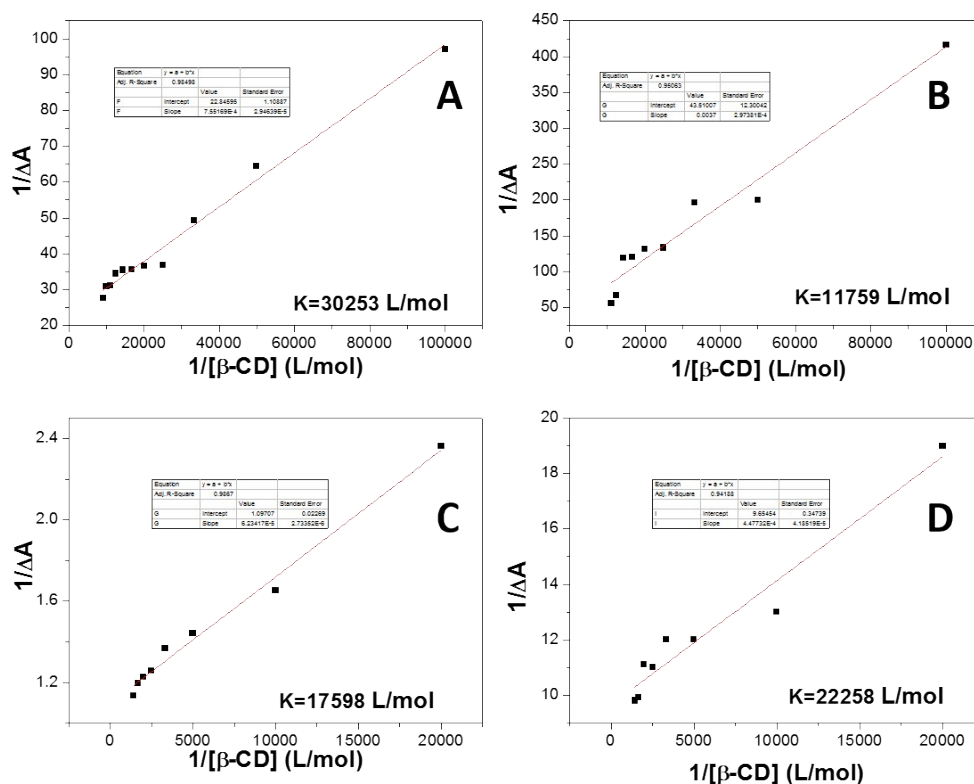

**Figure S8.** Double reciprocal plots of the supramolecular inclusion complexes in water: (A) the complex constant calculated of  $\beta$ -CD/*azo-SN-38* in 1:1 mode (G/H,  $r^2 = 0.98498$ ,  $K=30253$  L/mol); (B) the complex constant of  $\beta$ -CD/*azo-DOX* calculated in 1:1 mode (G/H,  $r^2 = 0.95063$ ,  $K=11759$  L/mol); (C) the complex constant of  $\beta$ -CD/*azo-phenytoin* calculated in 1:1 mode (G/H,  $r^2 = 0.9867$ ,  $K=17598$  L/mol); (D) the complex constant of  $\beta$ -CD/*azo-aliskiren* calculated in 1:1 mode (G/H,  $r^2 = 0.94188$ ,  $K=22258$  L/mol). The Benesi-Hildebrand equation is expressed as  $1/\Delta A = 1/\alpha + 1/\alpha K_{ap}[\beta\text{-CD}]^n$ , where  $\Delta A$  is the change of UV absorbance of *azo-drugs* in presence of  $\beta$ -CD,  $\alpha$  is a constant,  $[\beta\text{-CD}]$  is the initial concentration of  $\beta$ -CD.  $K_{ap}$  is the constant for the formation of n:1 (H:G) inclusion complex, which could be calculated from a plot of  $1/\Delta A$  versus *azo-drug*/ $[\beta\text{-CD}]^n$ .

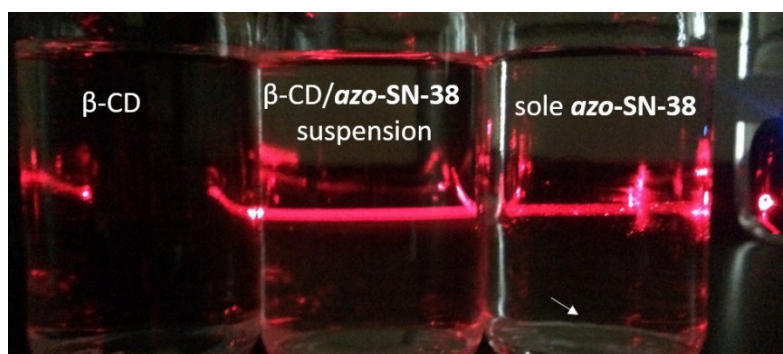

**Figure S9.** Different phenomenon of  $\beta$ -CD in aqueous solution (0.05 mM),  $\beta$ -CD/*azo*-SN-38 suspension (0.05 mM) and *azo*-SN-38 aqueous dispersion in water (0.05 mM) illuminated by a laser pointer. Precipitated solid can be found if left to stand still for 2 h shown at the arrow.

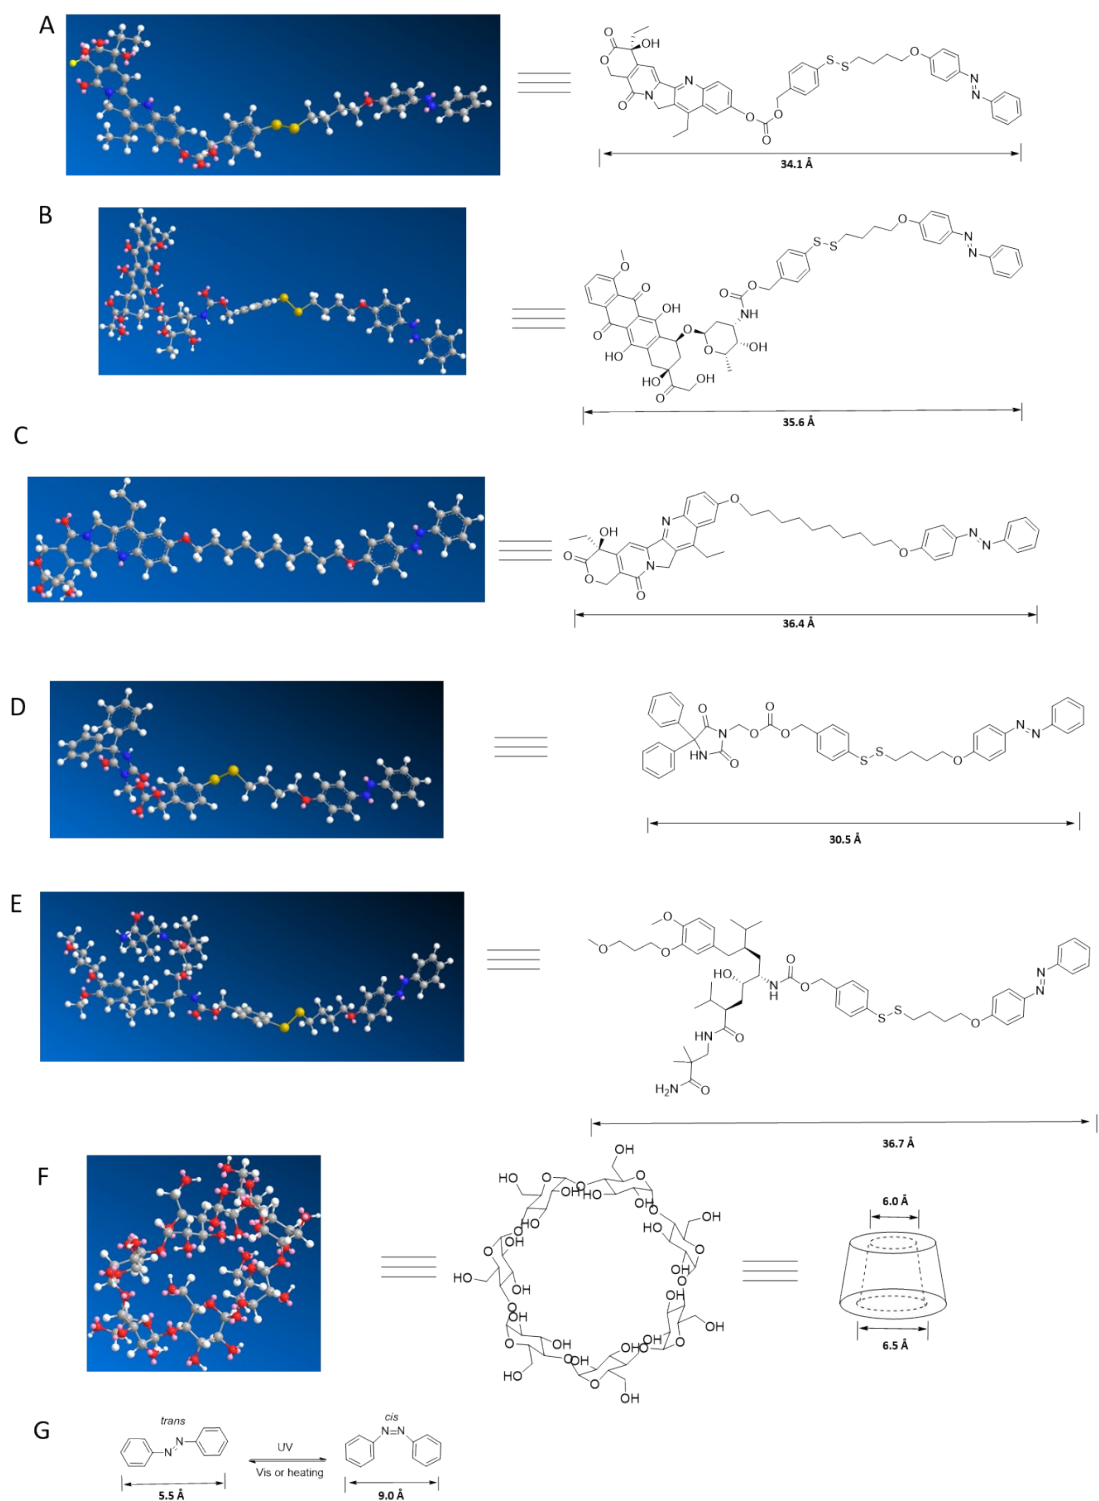

**Figure S10.** The molecular configuration after MM2 energy minimize calculation<sup>7</sup> and corresponding calculated molecular sizes: (A) *azo-SN-38*; (B) *azo-DOX*; (C) *azo-C<sub>10</sub>-SN-38*; (D) *azo-phenytoin*; (E) *azo-aliskiren*; (F)  $\beta$ -CD; (G) *azobenzene*.

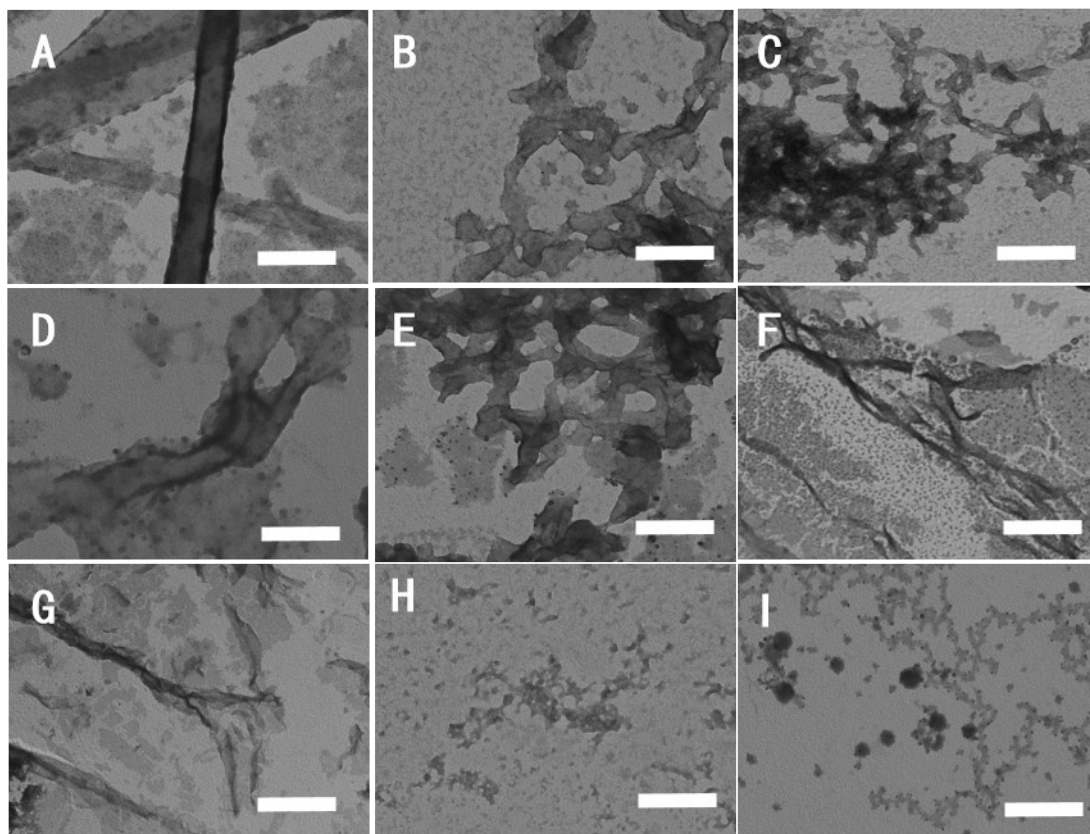

**Figure S11.** TEM micromorphology images of  $\beta$ -CD/*azo*-SN-38 samples treated by UV upon different time intervals (A: 0 min, B: 10 min, C: 20 min, D: 30 min, E: 40 min, F: 50 min, G: 60 min, H: 70 min, I: 80 min, scale bar = 1  $\mu$ m) with phosphotungstic acid as the negative staining agent.

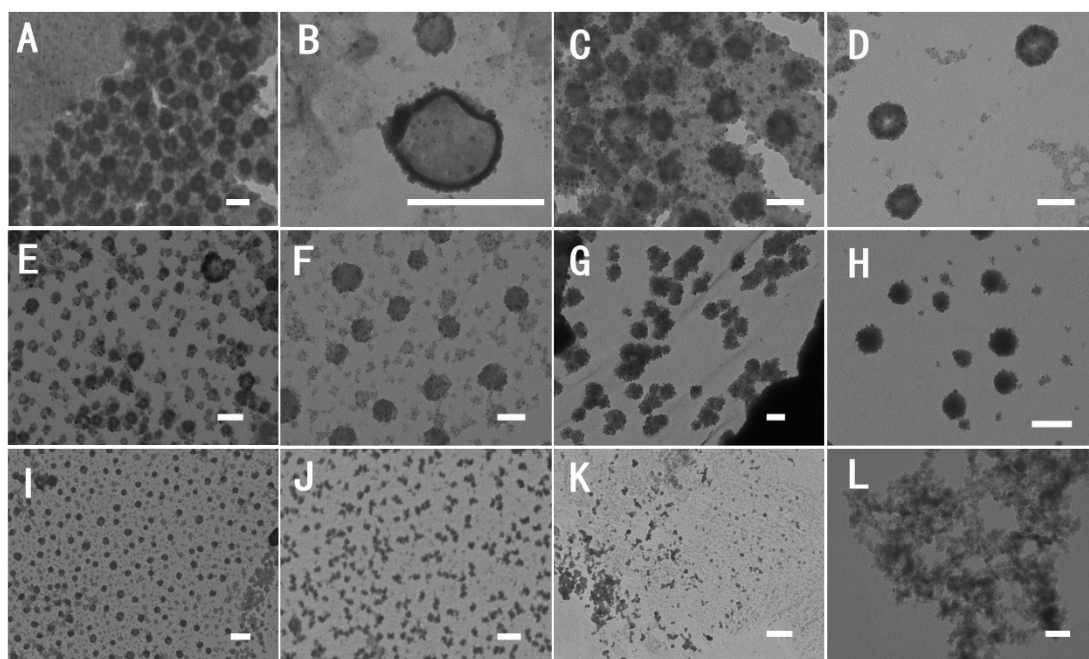

**Figure S12.** TEM micromorphology images of  $\beta$ -CD/*azo*-phenytoin samples treated by UV upon different time intervals (A: 0 min, B: 10 min, C: 20 min, D: 30 min, E: 40 min, F: 50 min, G: 60 min, H: 70 min, I: 80 min, J: 90 min, K: 100 min, L: 110 min; scale bar = 500 nm) with phosphotungstic acid as the negative staining agent.

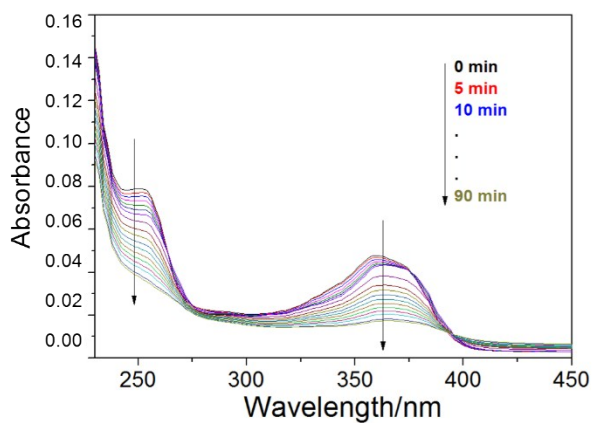

**Figure S13.** The UV-absorbance drop of the  $\beta$ -CD/*azo*-SN-38 sample in pure water treated by UV at different time intervals (from 0 to 90 min).

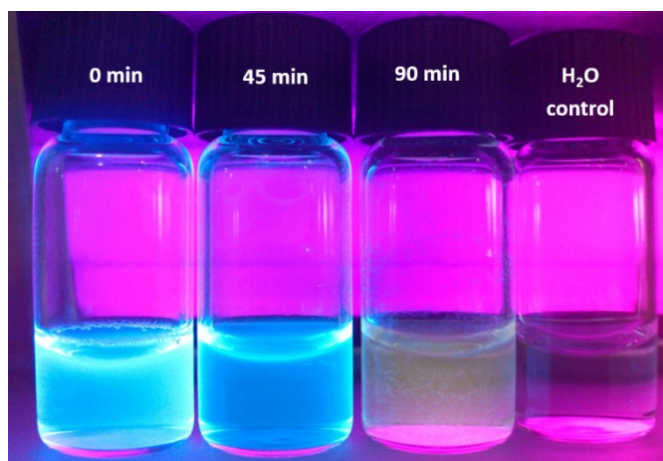

**Figure S14.** The fluorescence intensity variation of the  $\beta$ -CD/*azo*-SN-38 samples treated by UV irradiation at different time intervals (0 min, 45 min, 90 min and control).

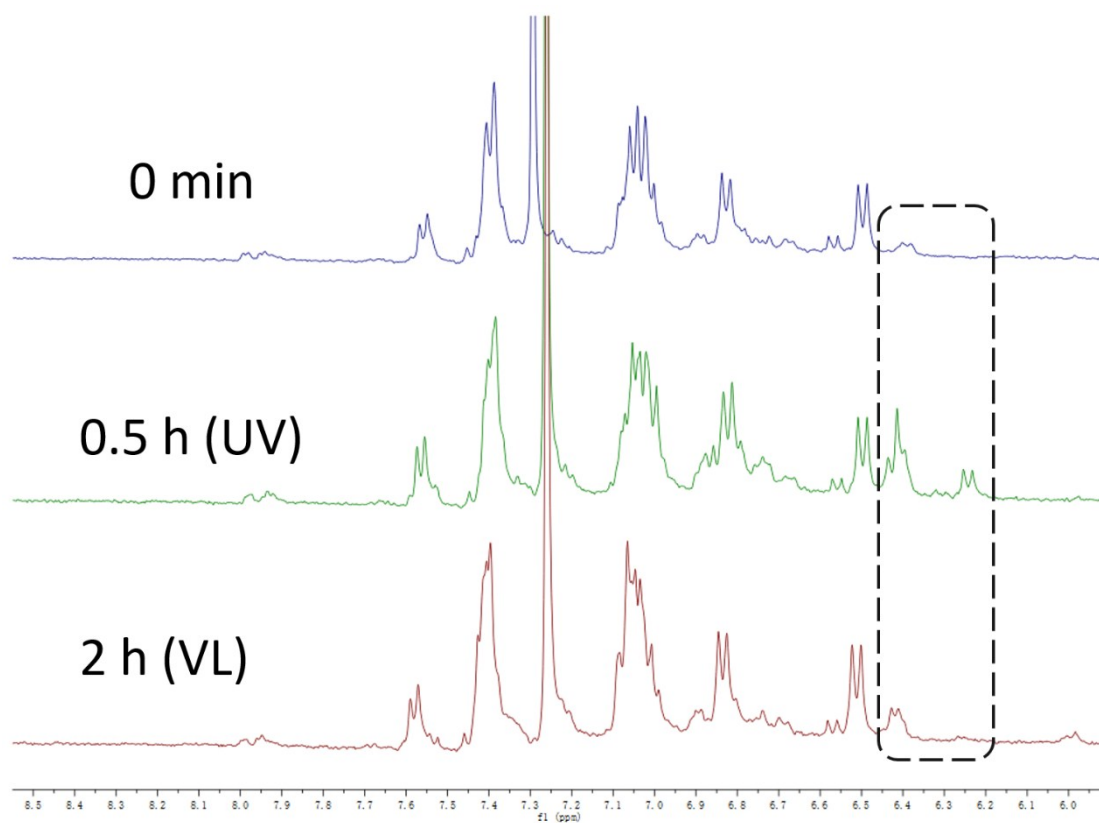

**Figure S15.** Enlarged <sup>1</sup>H NMR spectra (400 MHz in mixed CD<sub>3</sub>OD/CDCl<sub>3</sub> (2/1 v/v) at 298 K) from the same tube of *azo-DOX* before (0 min), after the UV irradiation (365 nm, 60 mW·cm<sup>-2</sup>, 0.5 h) and after visible light irradiation ( $\lambda = 434$  nm, 20 mW·cm<sup>-2</sup>, 2 h).

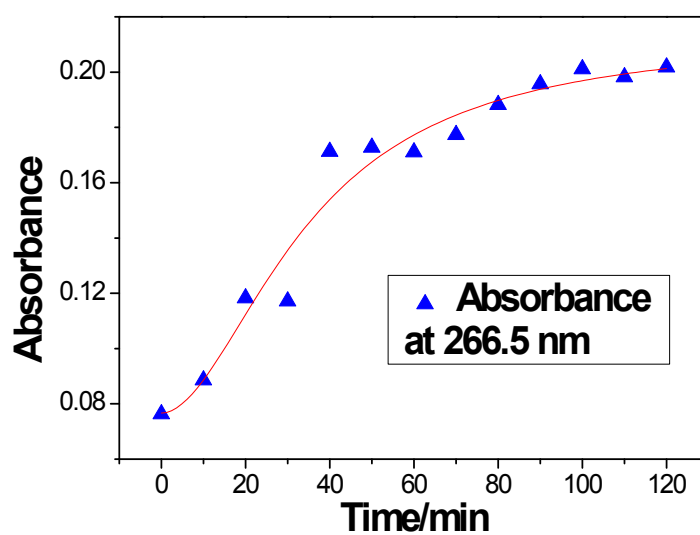

**Figure S16.** The UV-absorbance increase of the *azo-SN-38* sample in MeOH/CHCl<sub>3</sub> (2/1 v/v, 10<sup>-5</sup> mol/L) treated by UV at different time intervals (from 0 to 120 min).



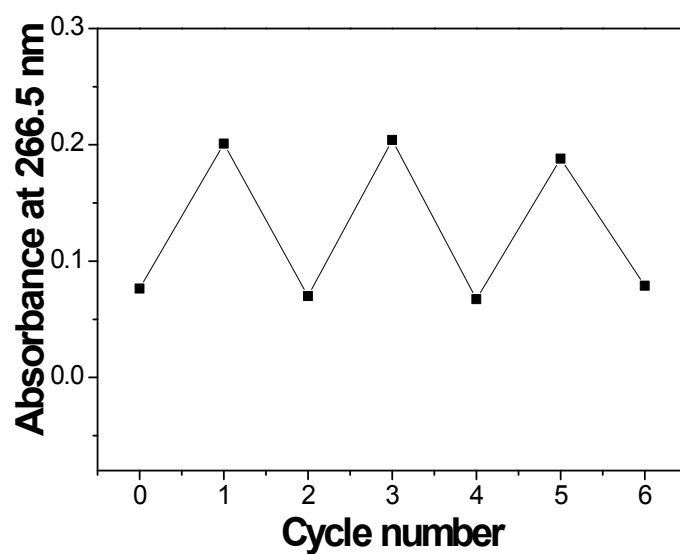

**Figure S17.** UV-absorbance variation at 266.5 nm of the *azo-SN-38* sample in MeOH/CHCl<sub>3</sub> (2/1 v/v, 10<sup>-5</sup> mol/L) with commutative UV and visible light irradiation.

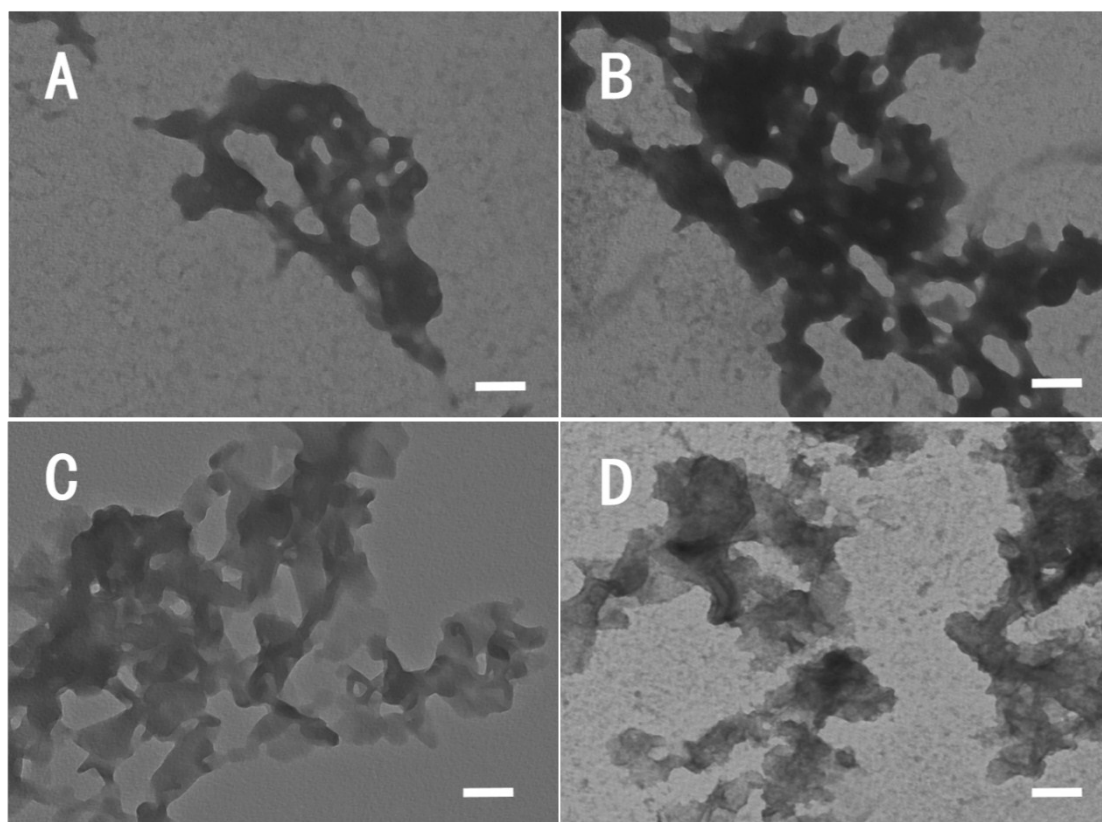

**Figure S18.** The micro morphologies after the treatment of excess reductant recorded by TEM (scale bar = 1  $\mu$ m) with phosphotungstic acid as the negative staining agent: A:  $\beta$ -CD/*azo-SN-38*+DTT; B:  $\beta$ -CD/*azo-SN-38*+GSH; C:  $\beta$ -CD/*azo-DOX*+DTT; D:  $\beta$ -CD/*azo-DOX*+GSH.

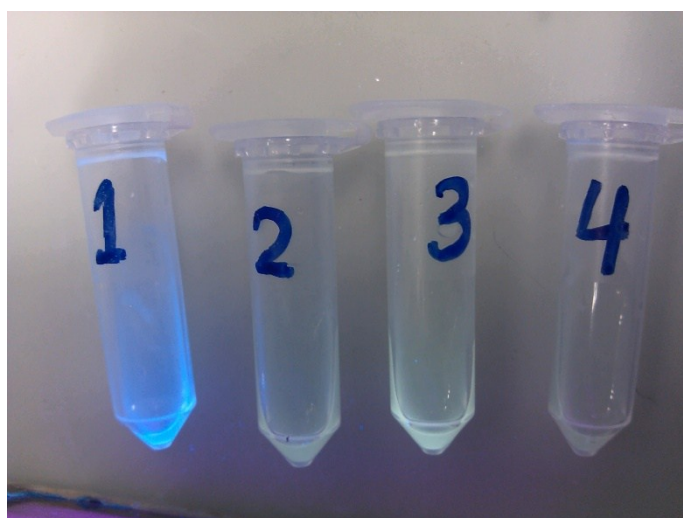

**Figure S19.** The fluorescence intensity change of the  $\beta$ -CD/*azo*-SN-38 samples treated by GSH at different time intervals (1: 0 min, 2: 30 min, 3: 60 min and 4: 90 min).

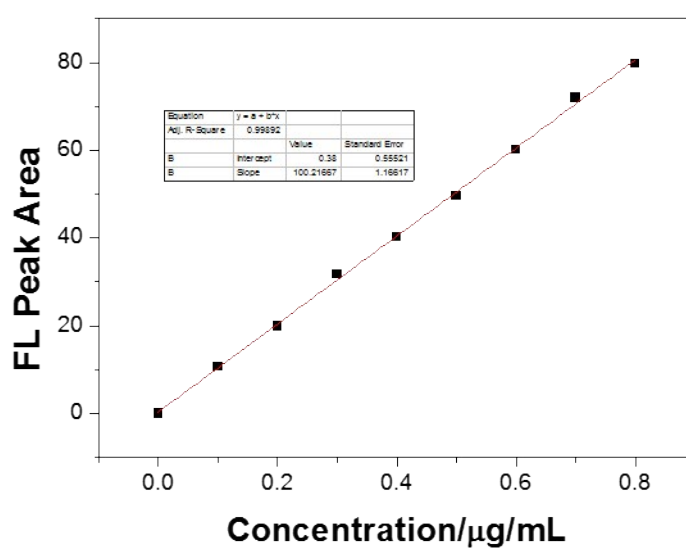

**Figure S20.** The standard curve of SN-38 concentration in aqueous solution determined by HPLC ( $n=3$ ,  $r^2=0.99892$ ).

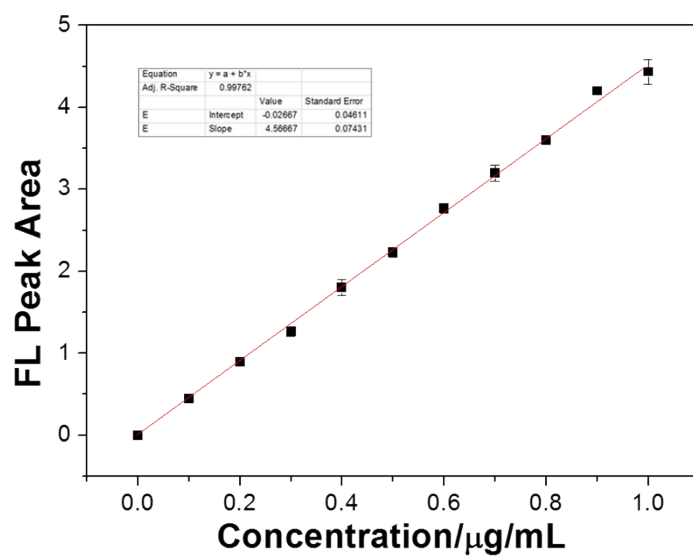

**Figure S21.** The standard curve of DOX concentration in aqueous solution determined by HPLC (n=3,  $r^2=0.99762$ ).

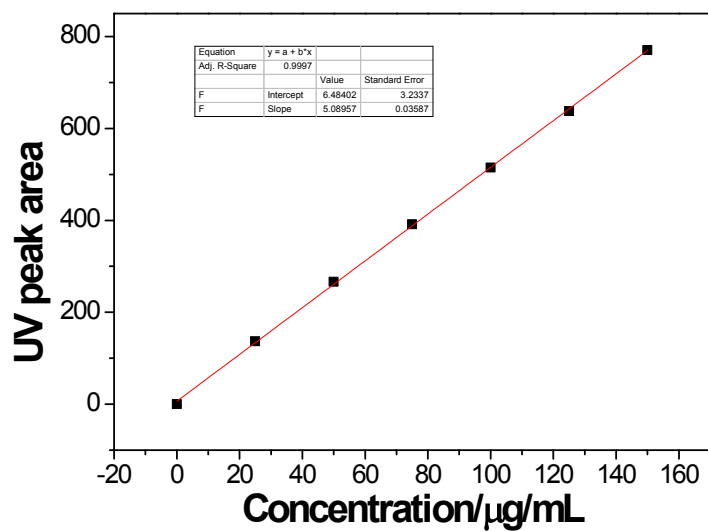

**Figure S22.** The standard curve of phenytoin concentration in aqueous solution determined by HPLC (n=3,  $r^2=0.9997$ ).

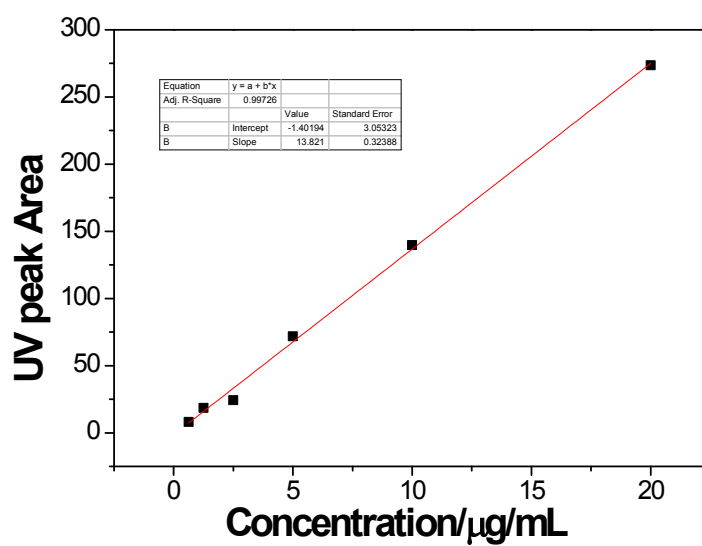

**Figure S23.** The standard curve of aliskiren concentration in aqueous solution determined by HPLC ( $r^2=0.99726$ ).

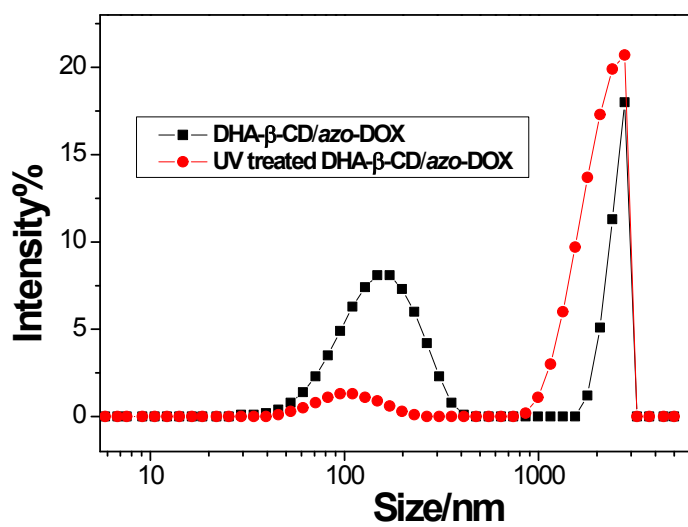

**Figure S24.** The size change of DHA- $\beta$ -CD/azo-DOX sample in water ( $10^{-4}$  mol/L) before and after UV treatment (254 nm,  $60 \text{ mW} \cdot \text{cm}^{-2}$ , 30 min) by DLS at room temperature.

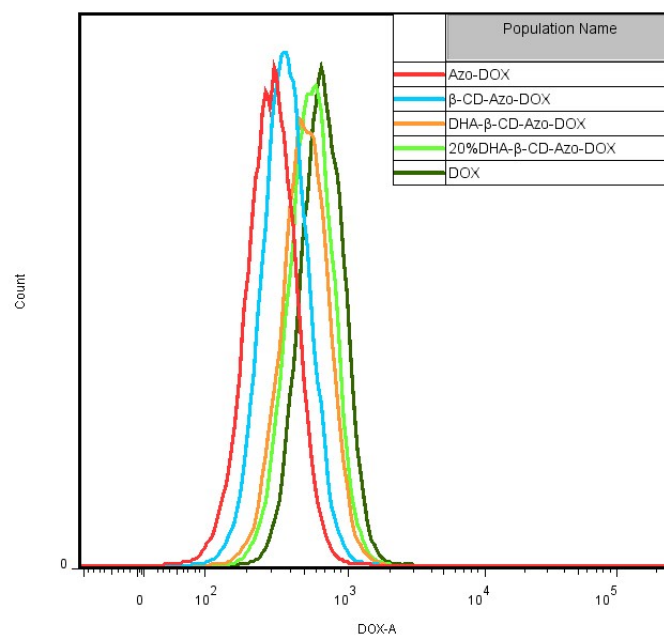

**Figure S25.** Flow cytometry quantitative analysis of different DOX formulations, including free DOX·HCl, *azo*-DOX,  $\beta$ -CD/*azo*-DOX, DHA- $\beta$ -CD (20% in  $\beta$ -CD)/*azo*-DOX and DHA- $\beta$ -CD/*azo*-DOX

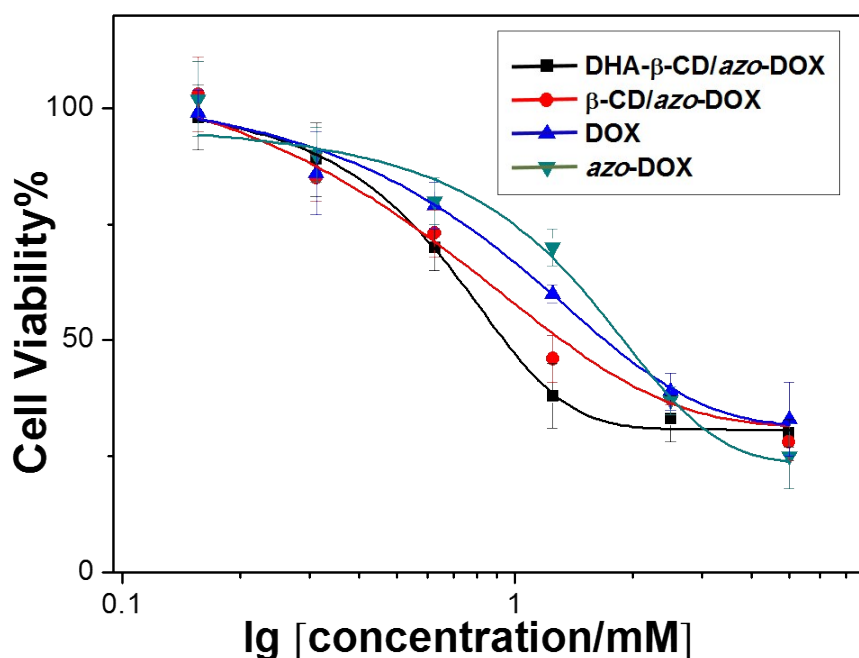

**Figure S26.** *In vitro* cytotoxicity of different DOX formulations at various concentrations against MDA-MB-231 tumor cells 48 h after incubation. Data are represented as mean  $\pm$  SD (n = 3).



## Characterizations of all compounds

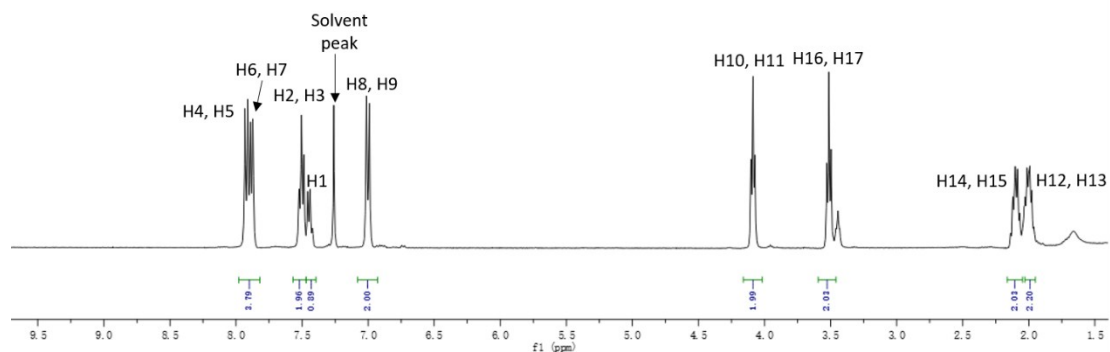

**Figure S27.** <sup>1</sup>H NMR spectrum of **2** in CDCl<sub>3</sub> at ambient temperature.

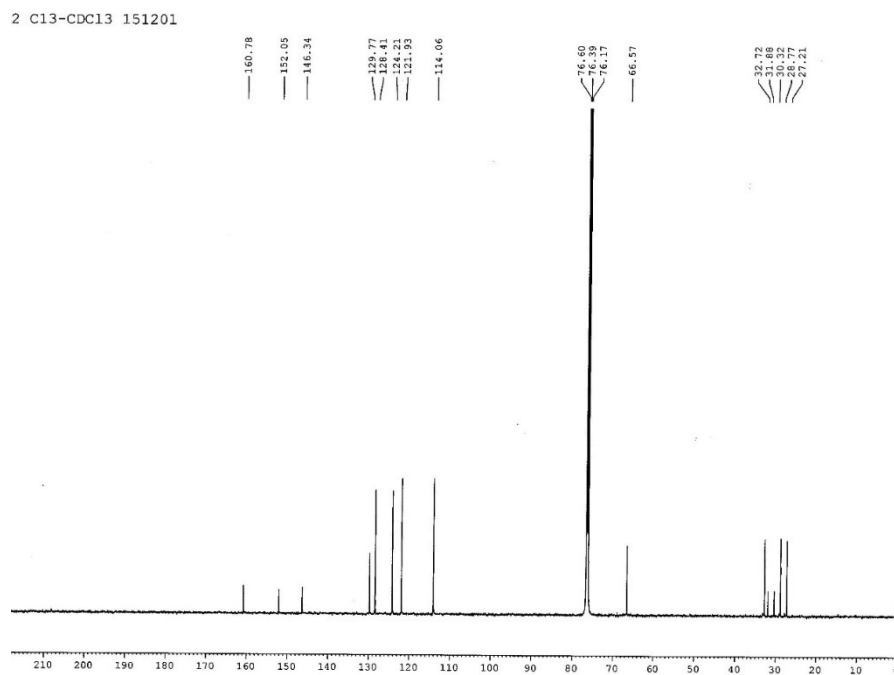

**Figure S28.** <sup>13</sup>C NMR spectrum of **2** in CDCl<sub>3</sub> at ambient temperature.

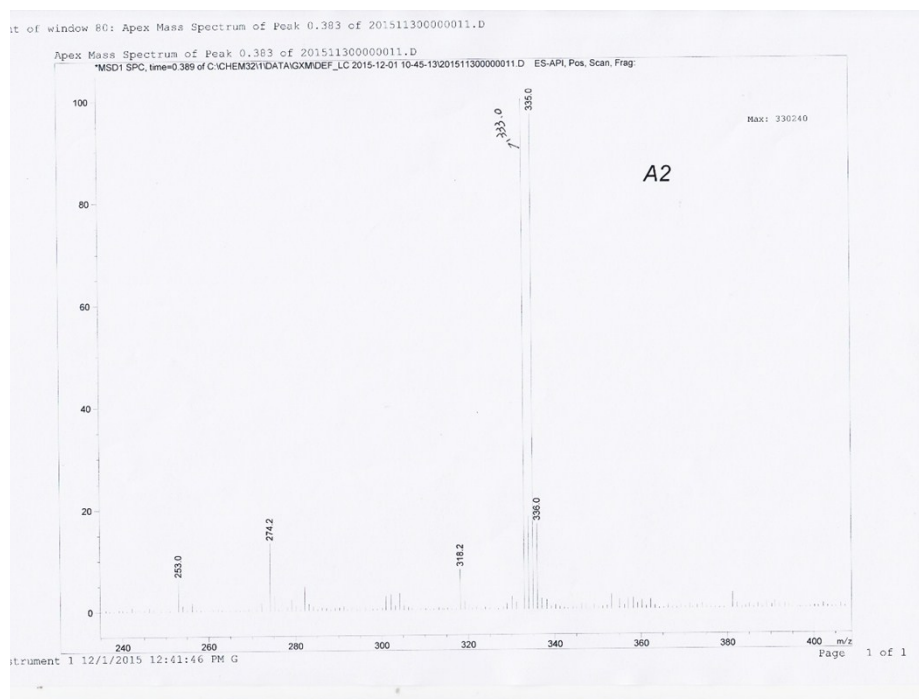

**Figure S29.** MS-ESI spectrum of **2** in  $\text{CDCl}_3$  at ambient temperature.

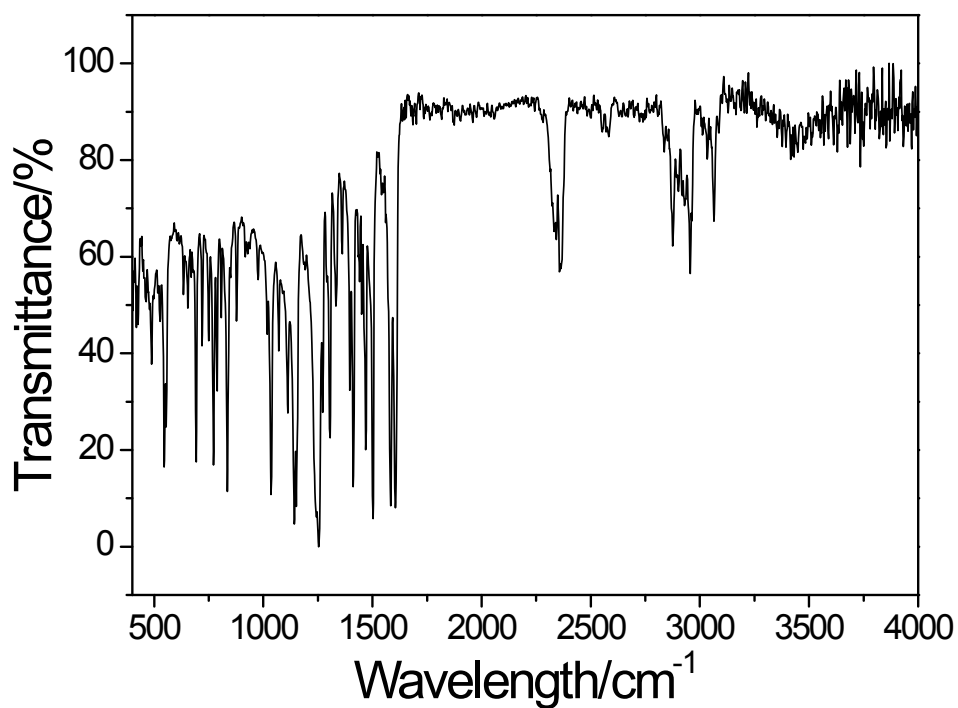

**Figure S30.** FT-IR spectrum of **3** in KBr tablet at ambient temperature.



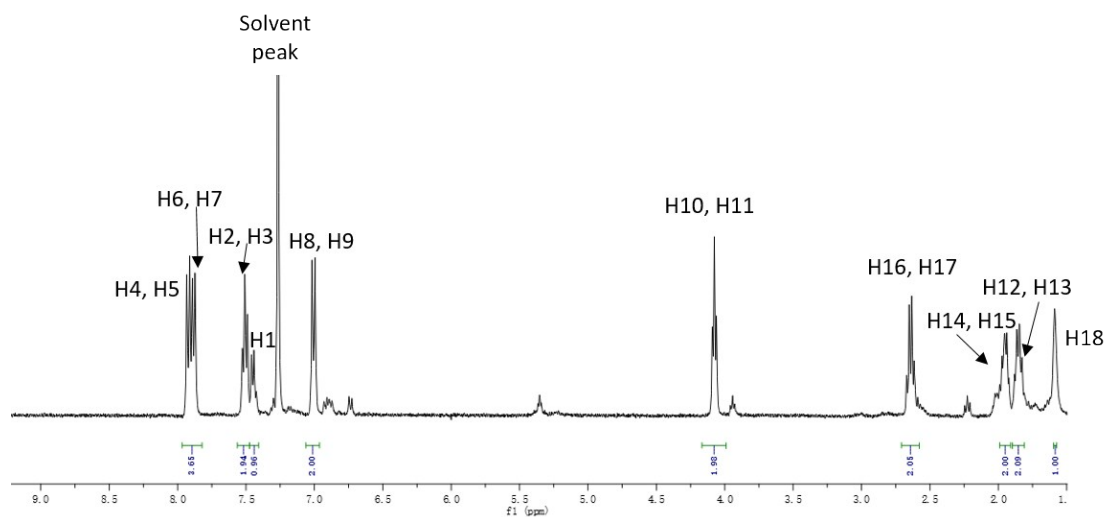

**Figure S31.**  $^1\text{H}$  NMR spectrum of **3** in  $\text{CDCl}_3$  at ambient temperature.

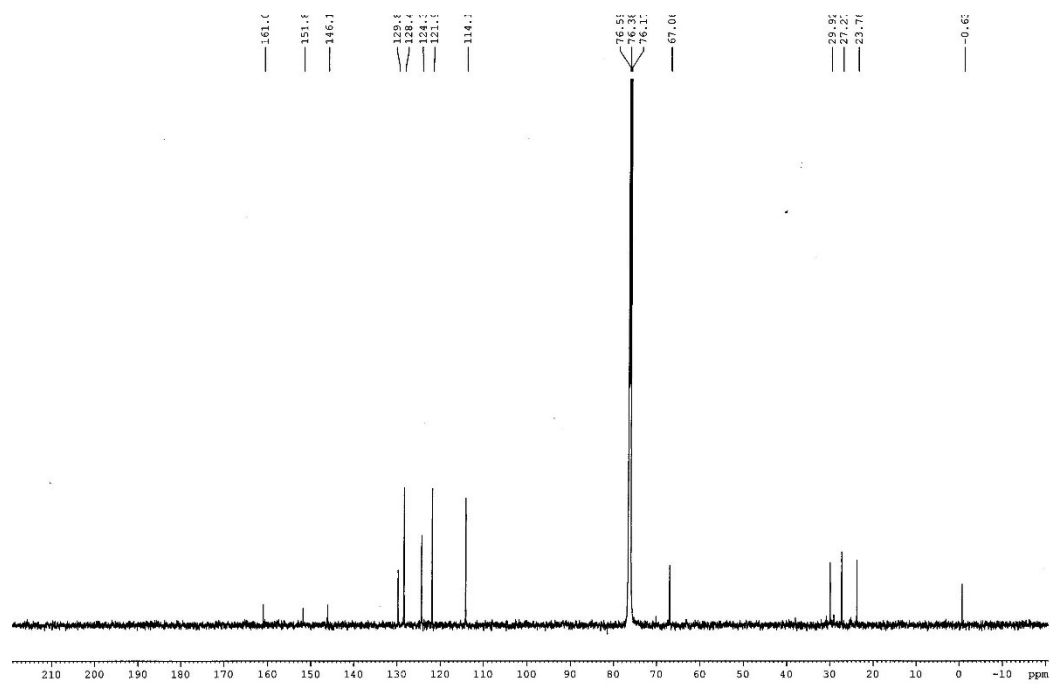

**Figure S32.**  $^{13}\text{C}$  NMR spectrum of **3** in  $\text{CDCl}_3$  at ambient temperature.

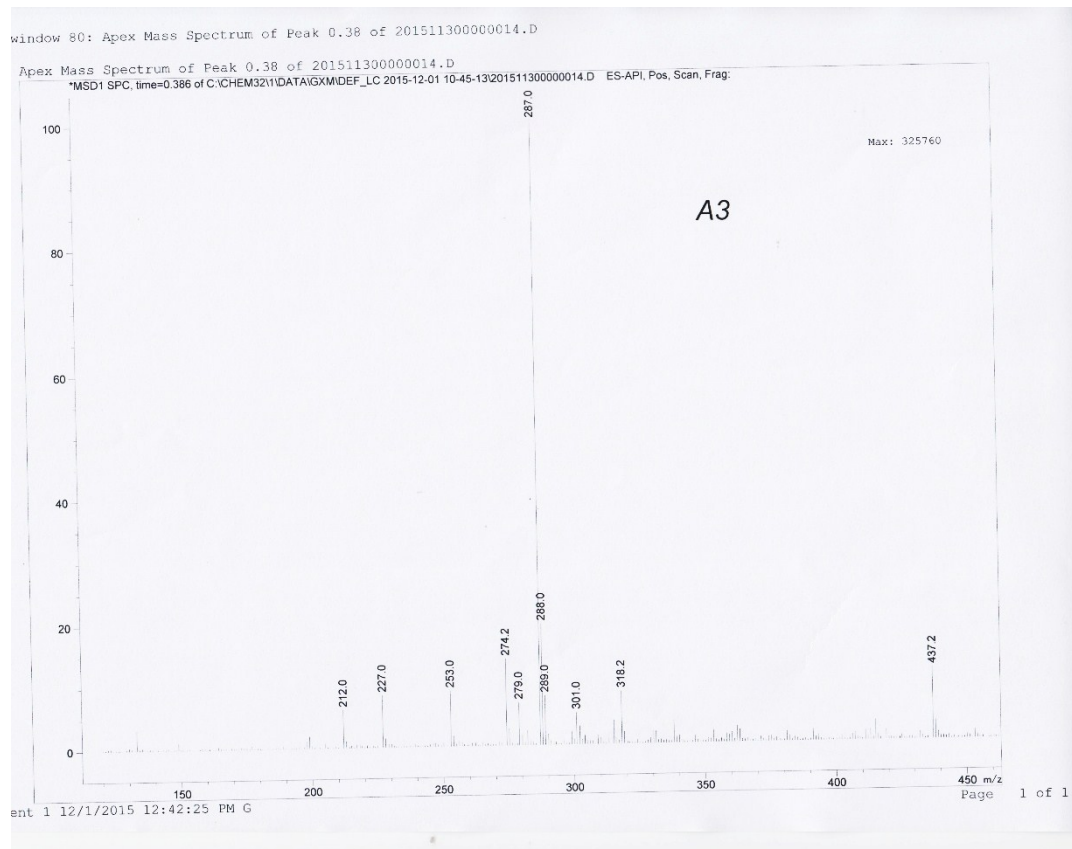

Figure S33. MS-ESI spectrum of **3** in  $\text{CDCl}_3$  at ambient temperature.

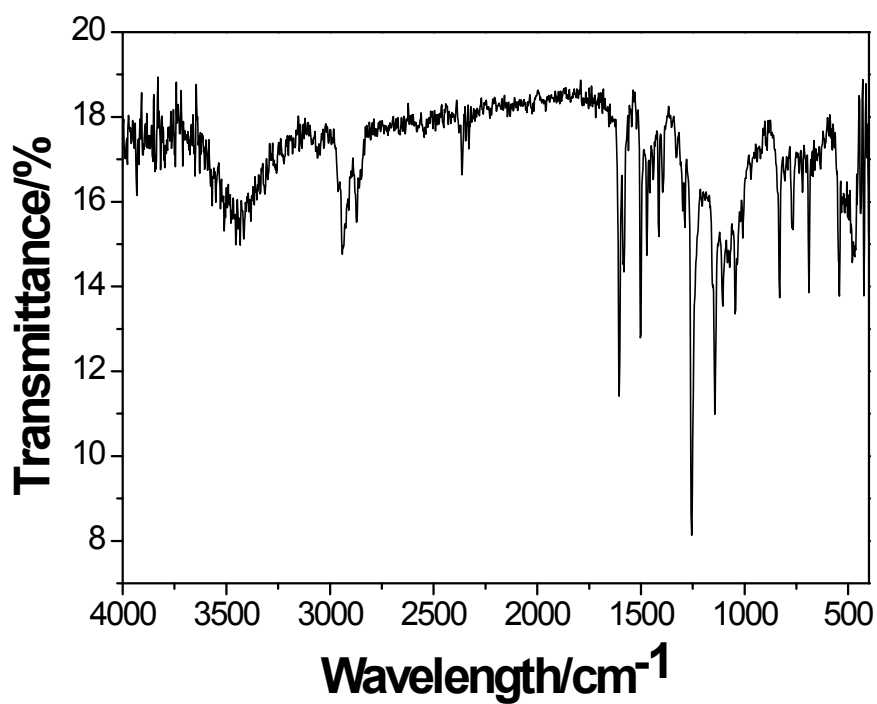

Figure S34. FT-IR spectrum of **3** in KBr tablet at ambient temperature.

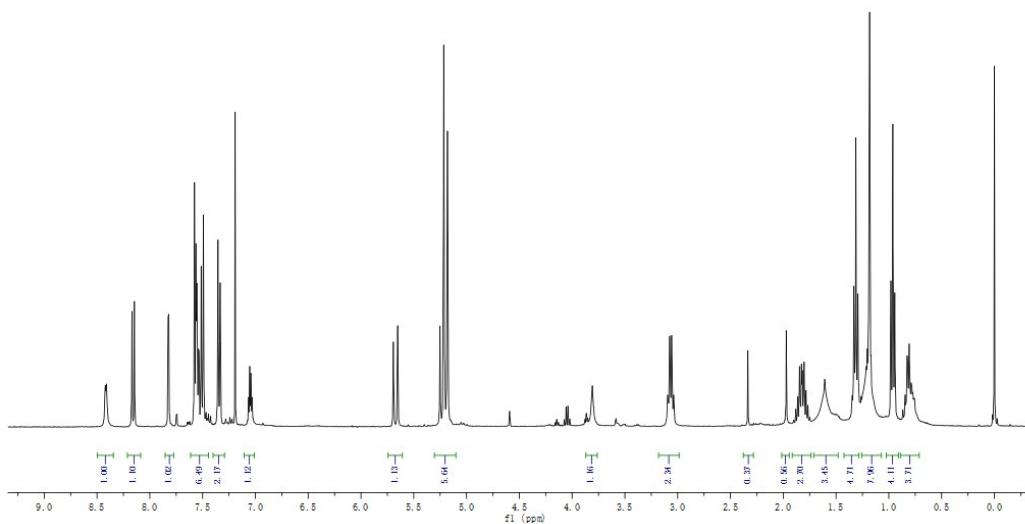

**Figure S35.**  $^1\text{H}$  NMR spectrum of **7** in  $\text{CDCl}_3$  at ambient temperature.

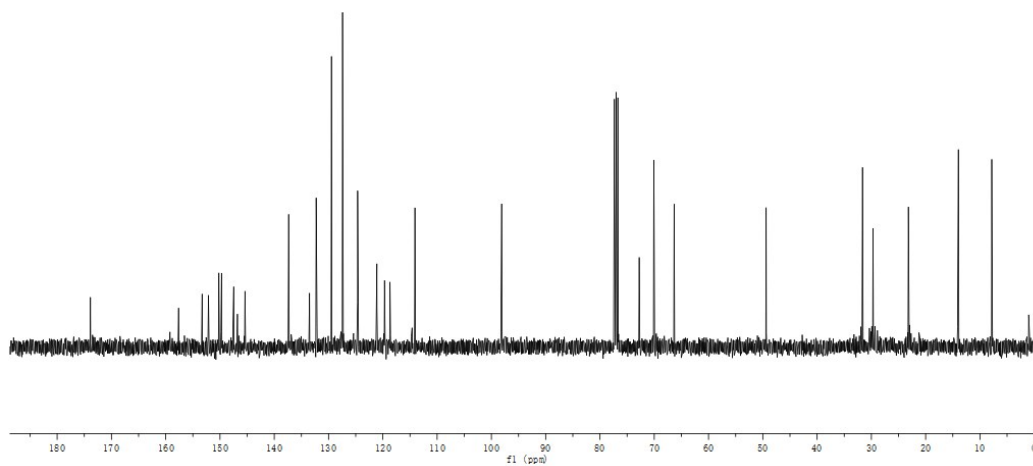

**Figure S36.**  $^{13}\text{C}$  NMR spectrum of **7** in  $\text{CDCl}_3$  at ambient temperature.

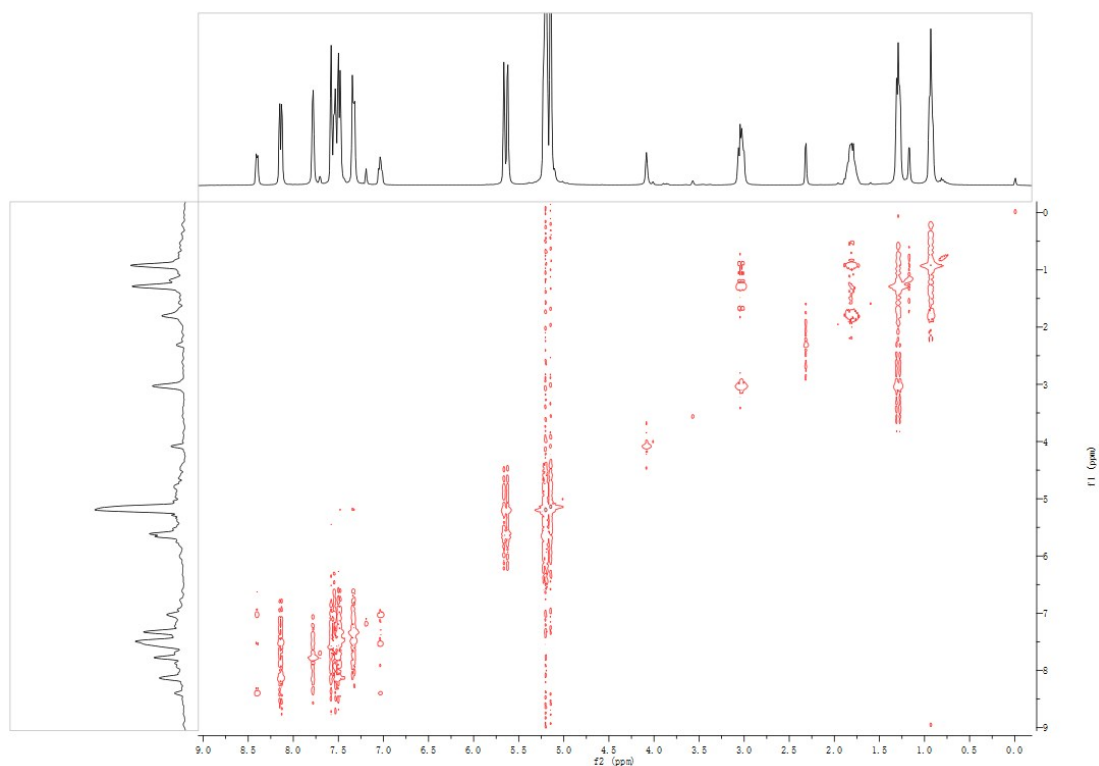

**Figure S37.** 2D NMR COSY spectrum of **7** in  $\text{CDCl}_3$  at ambient temperature.

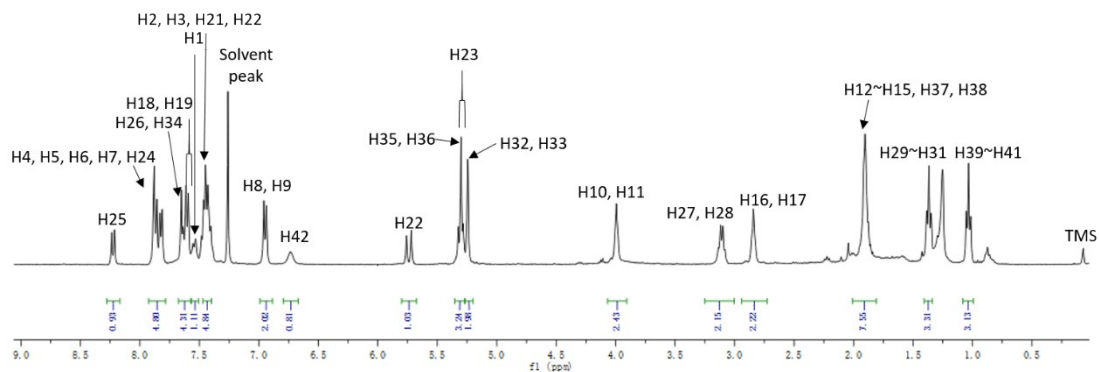

**Figure S38.**  $^1\text{H}$  NMR spectrum of *azo*-**SN-38** in  $\text{CDCl}_3$  at ambient temperature.

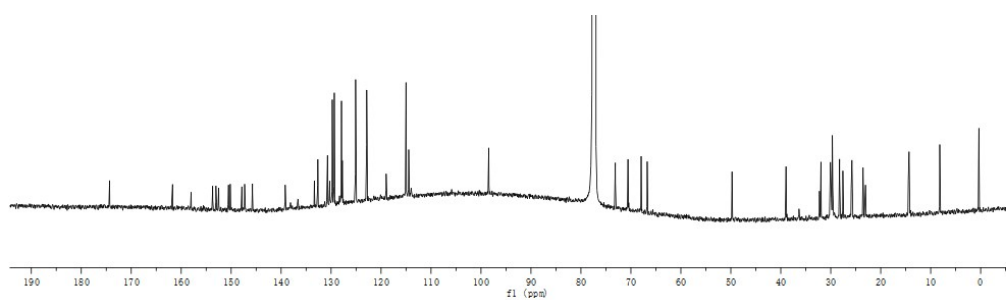

**Figure S39.**  $^{13}\text{C}$  NMR spectrum of *azo*-**SN-38** in  $\text{CDCl}_3$  at ambient temperature.

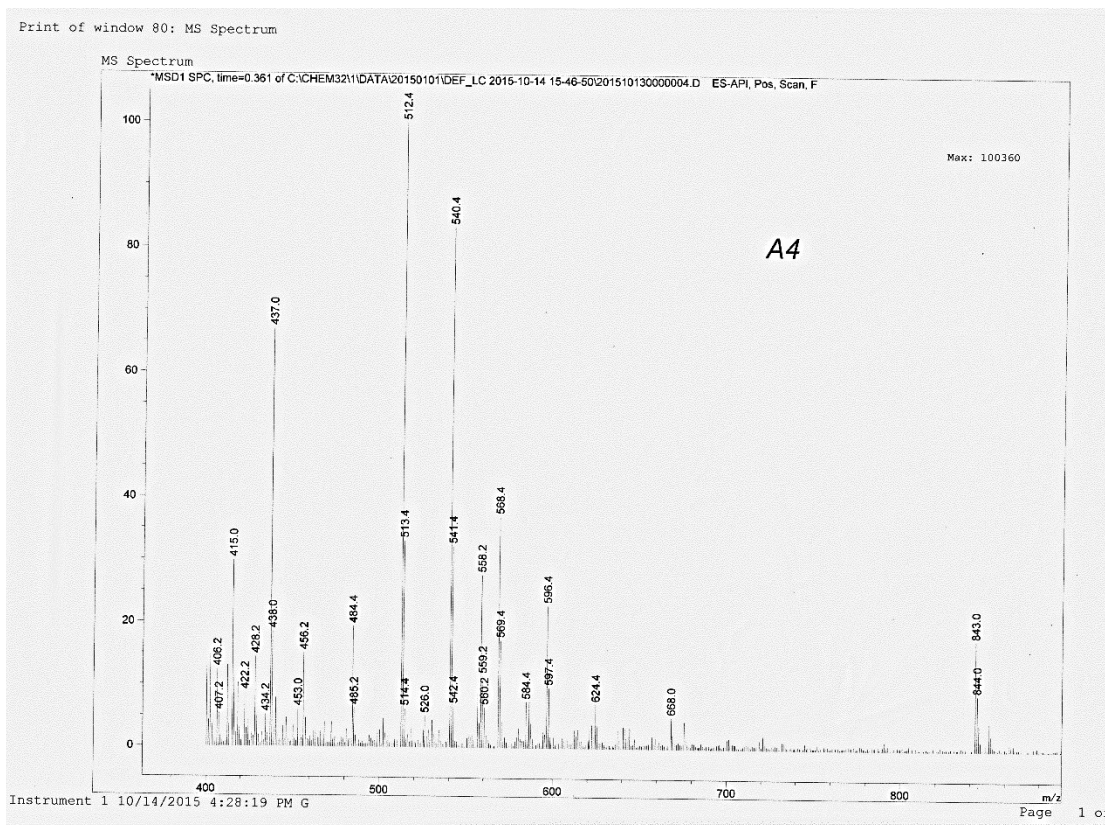

**Figure S40.** MS-ESI spectrum of *azo-SN-38* in  $\text{CDCl}_3$  at ambient temperature.

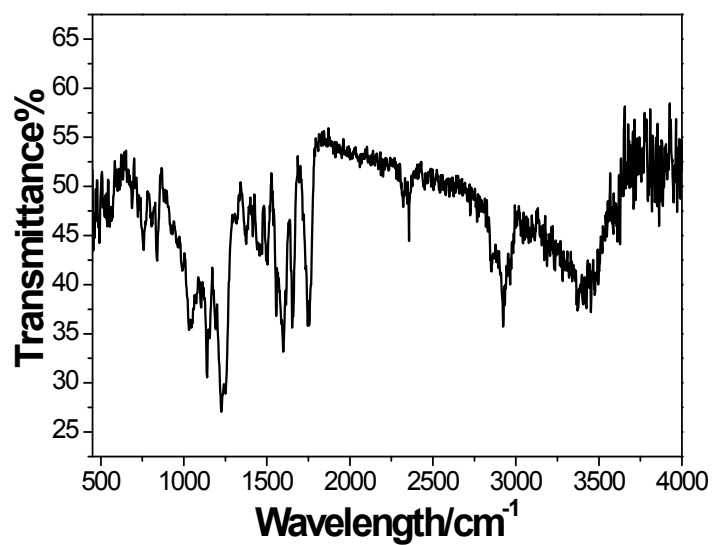

**Figure S41.** FT-IR spectrum of *azo*-SN-38 in KBr tablet at ambient temperature.

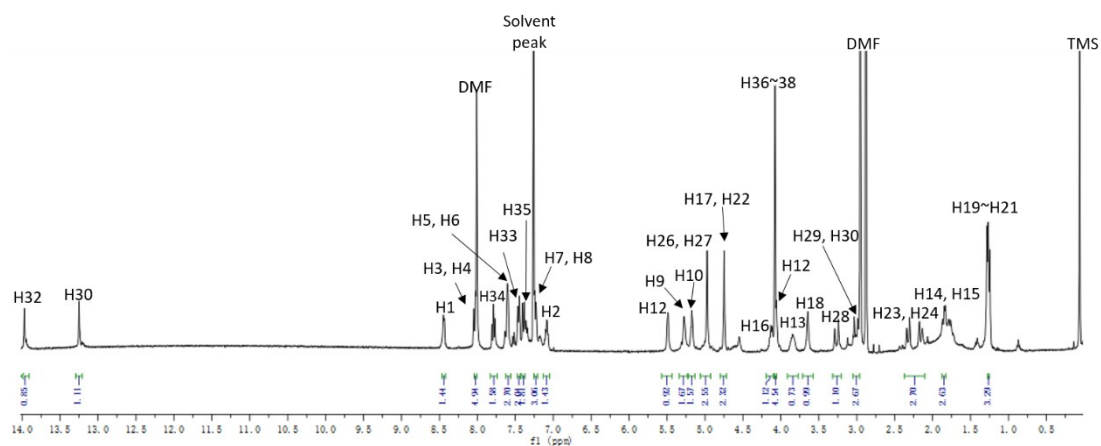

**Figure S42.**  $^1\text{H}$  NMR spectrum of **9** in  $\text{CDCl}_3$  at ambient temperature (with DMF residue).

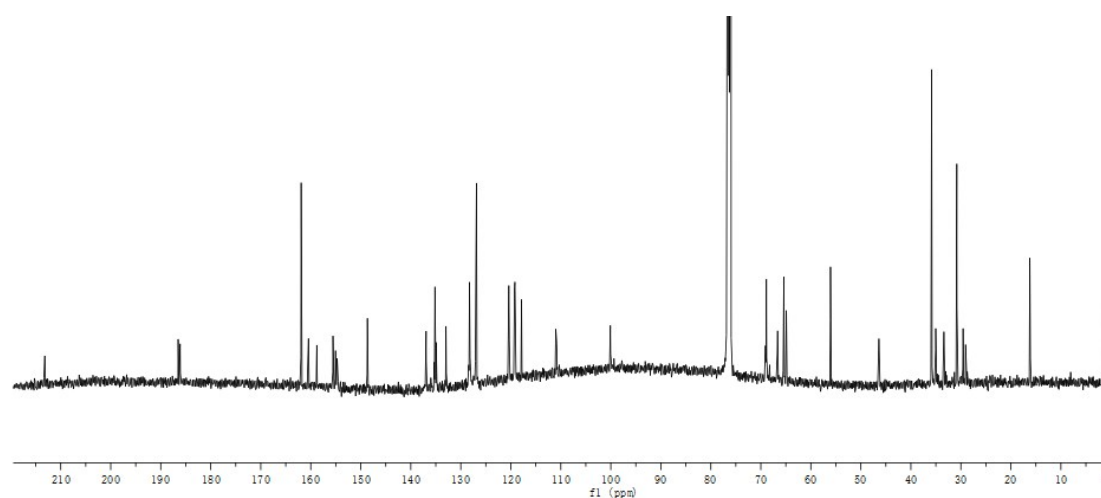

**Figure S43.**  $^{13}\text{C}$  NMR spectrum of **9** in  $\text{CDCl}_3$  at ambient temperature (with DMF residue).

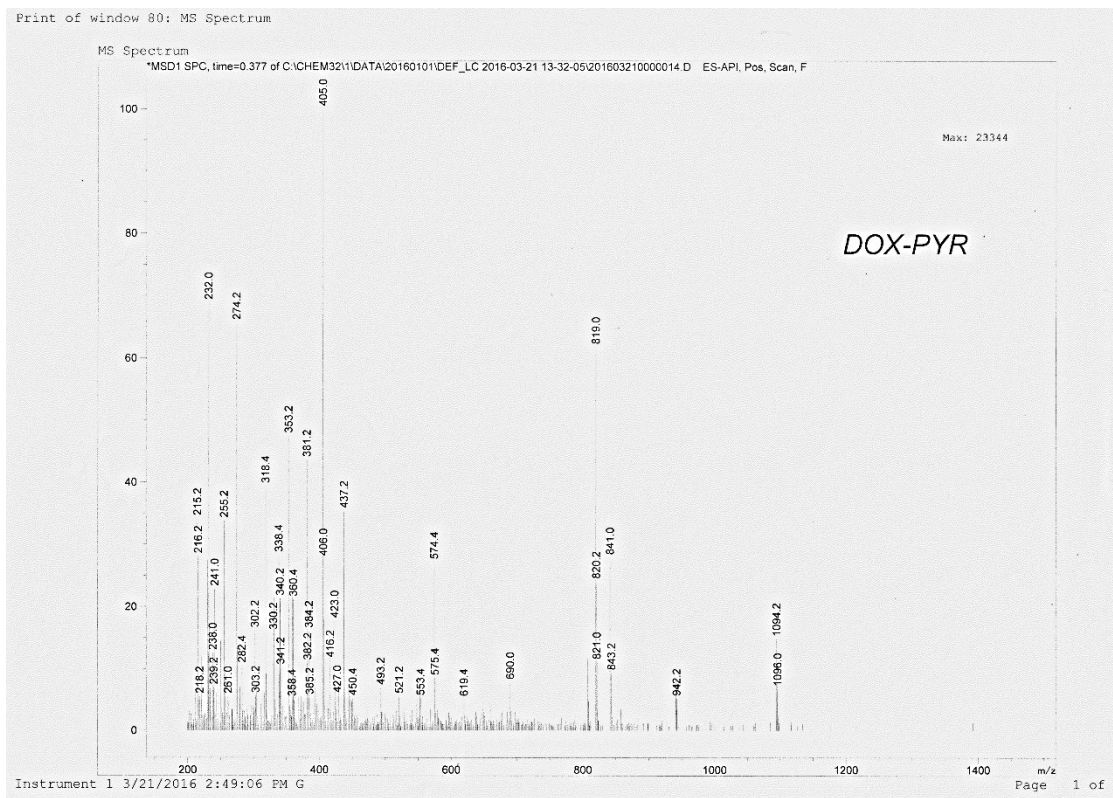

Figure S44. ESI-MS result of **9** at ambient temperature.

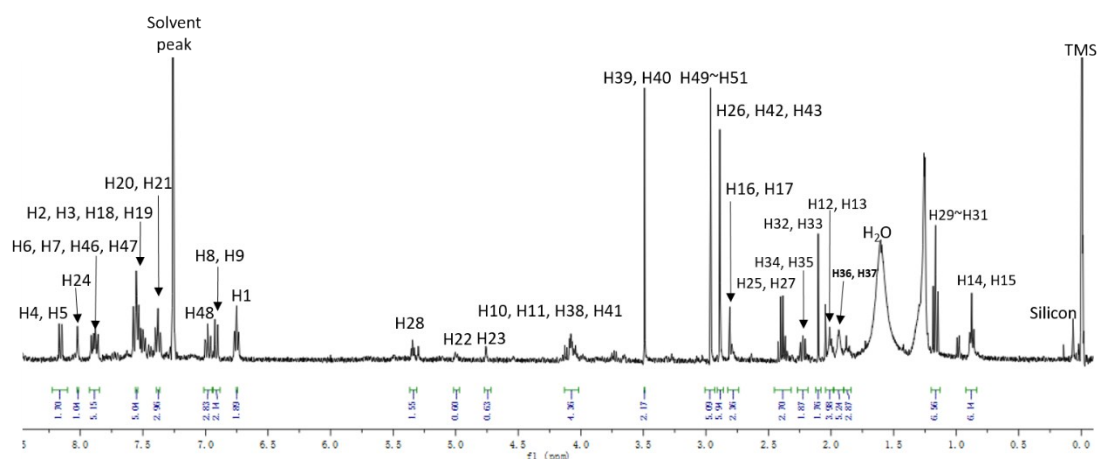

Figure S45.  $^1\text{H}$  NMR spectrum of *azo*-DOX in  $\text{CDCl}_3$  at ambient temperature.



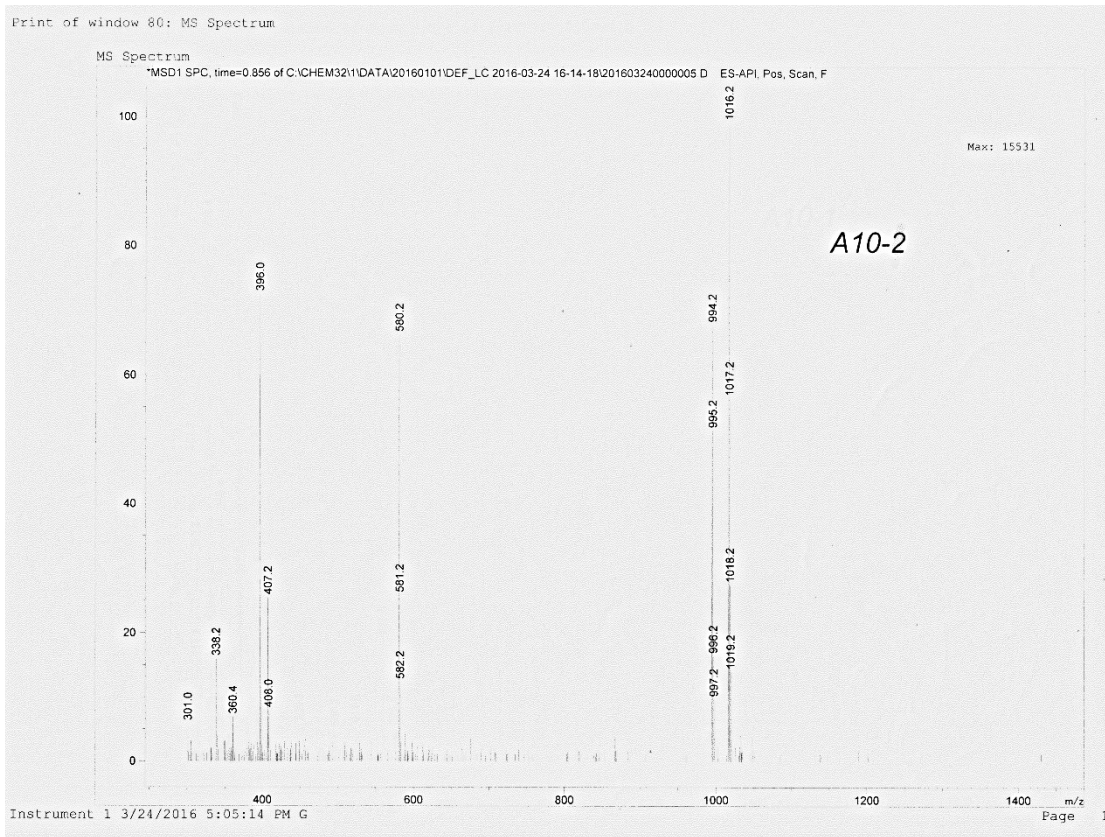

**Figure S46.** ESI-MS result of *azo-DOX* at ambient temperature.



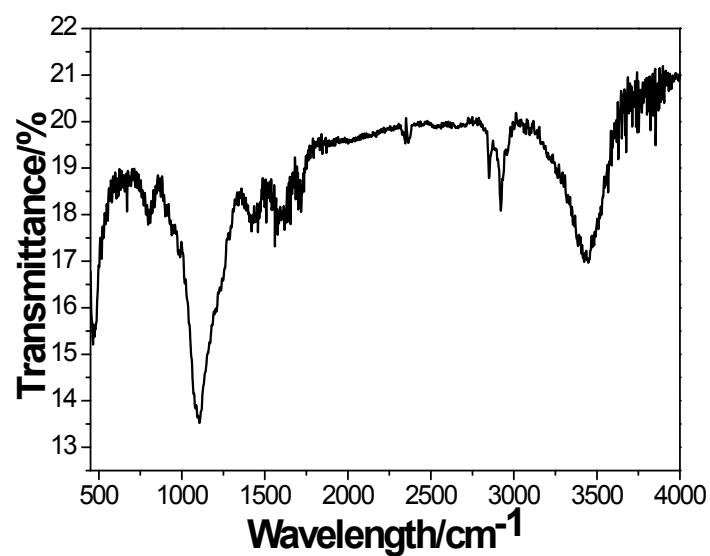

**Figure S47.** FT-IR spectrum of *azo-DOX* in KBr tablet at ambient temperature.

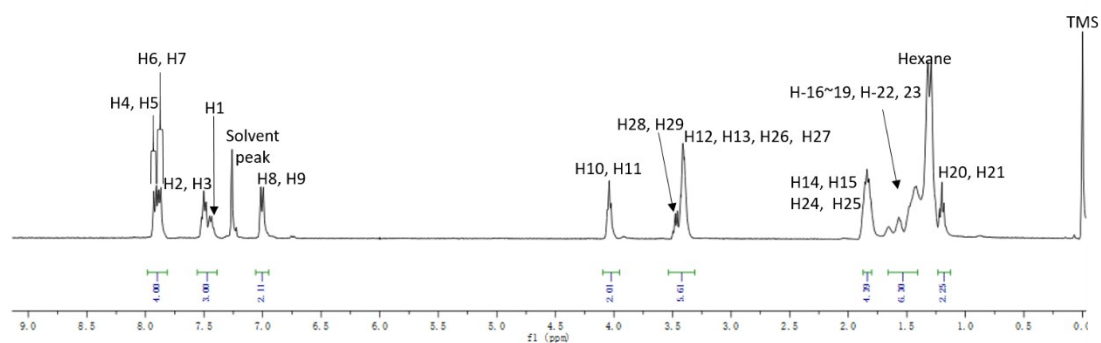

**Figure S48.**  $^1\text{H}$  NMR spectrum of **12** in  $\text{CDCl}_3$  at ambient temperature.

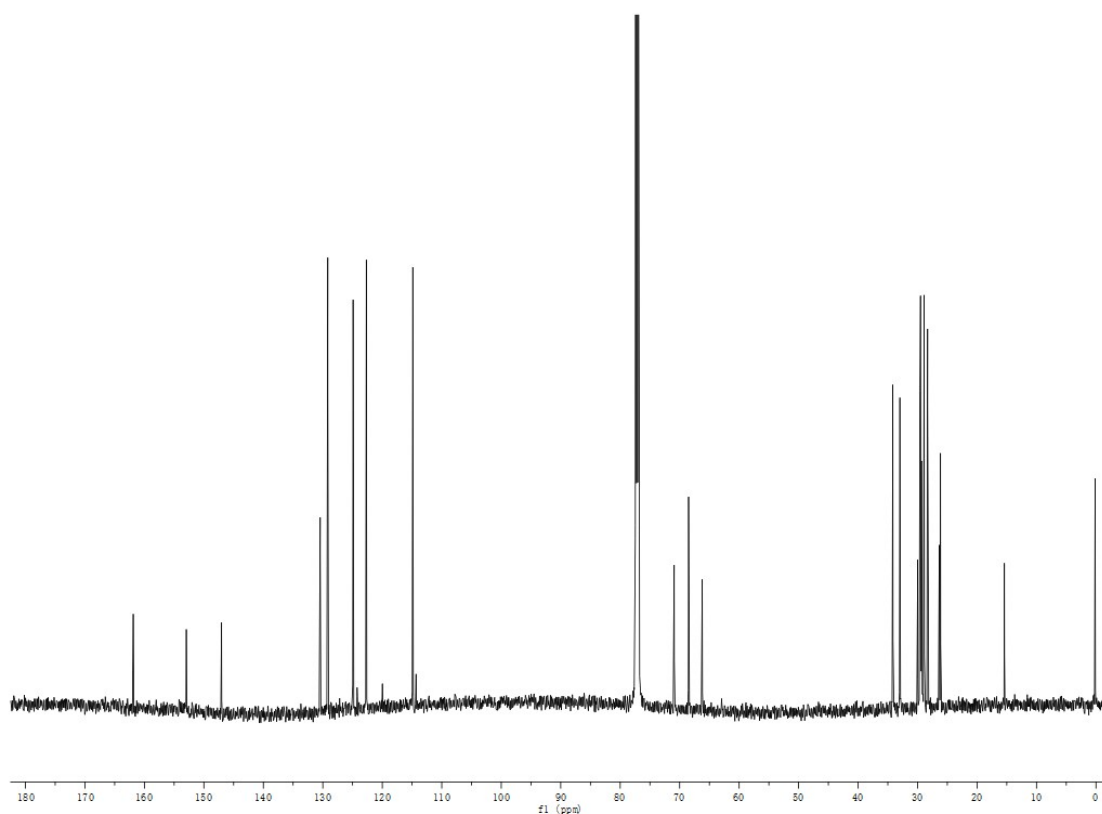

**Figure S49.**  $^{13}\text{C}$  NMR spectrum of **12** in  $\text{CDCl}_3$  at ambient temperature.

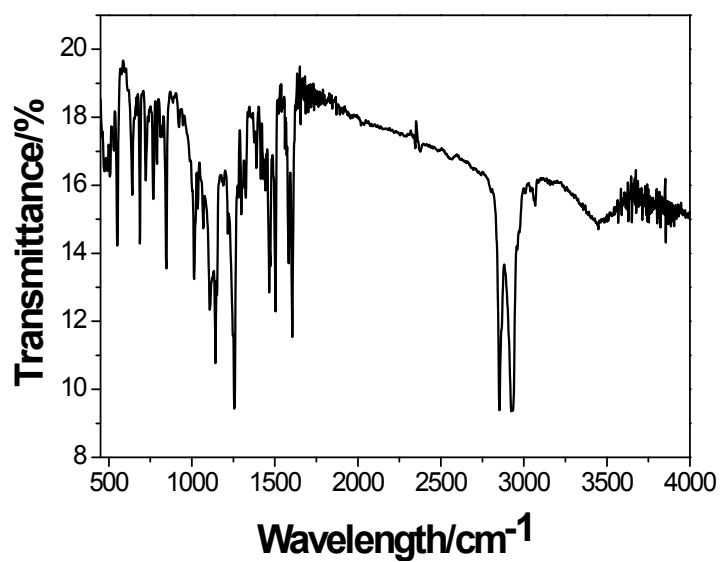

**Figure S50.** FT-IR spectrum of **12** in KBr tablet at ambient temperature.

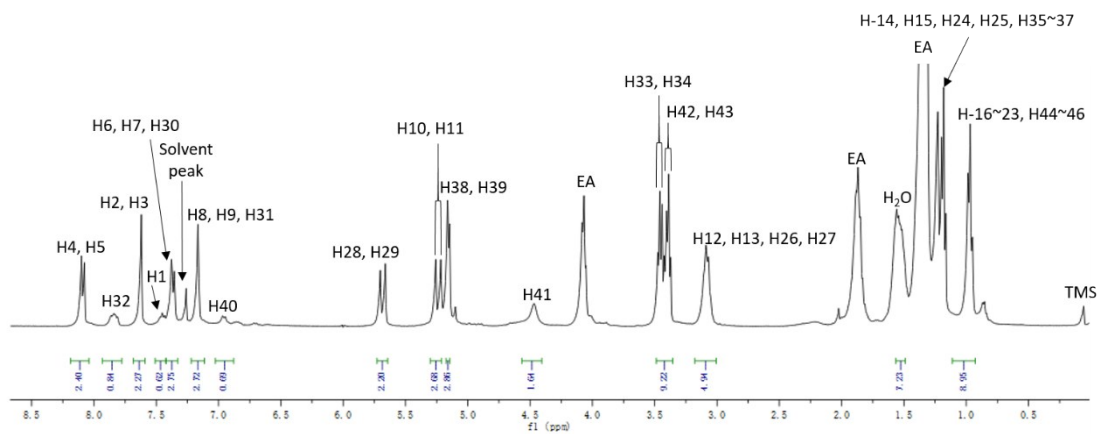

**Figure S51.**  $^1\text{H}$  NMR spectrum of **13** in  $\text{CDCl}_3$  at ambient temperature.

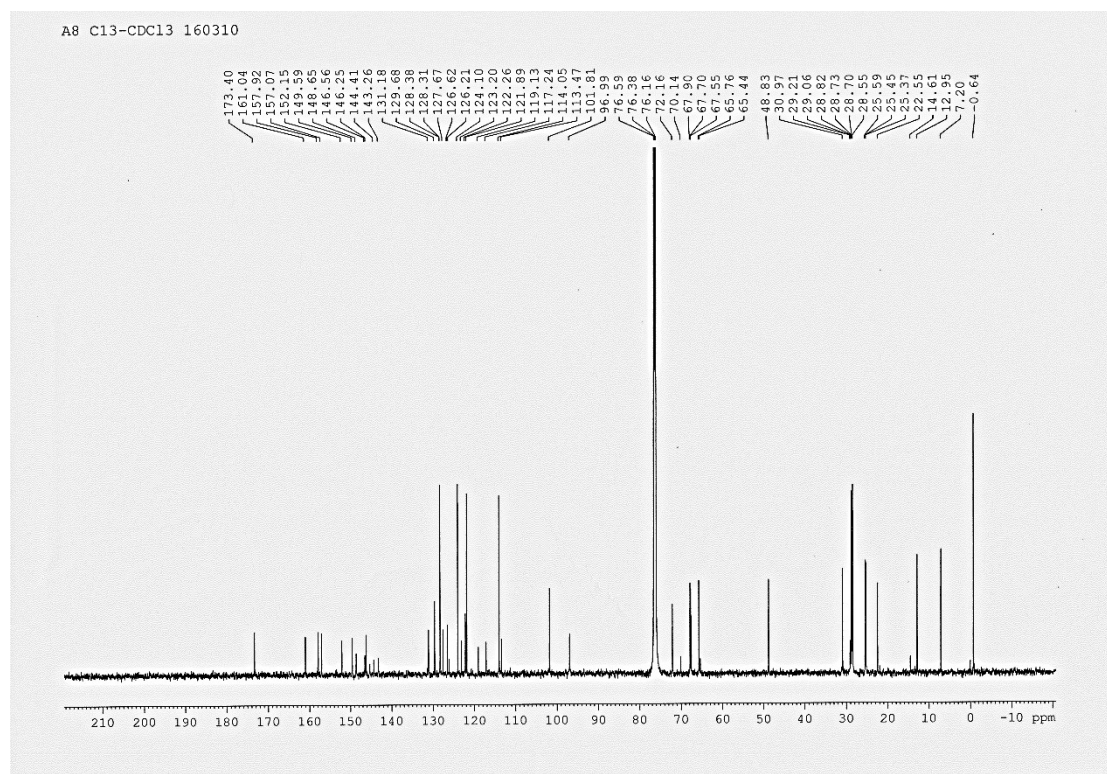

**Figure S52.**  $^{13}\text{C}$  NMR spectrum of **13** in  $\text{CDCl}_3$  at ambient temperature.

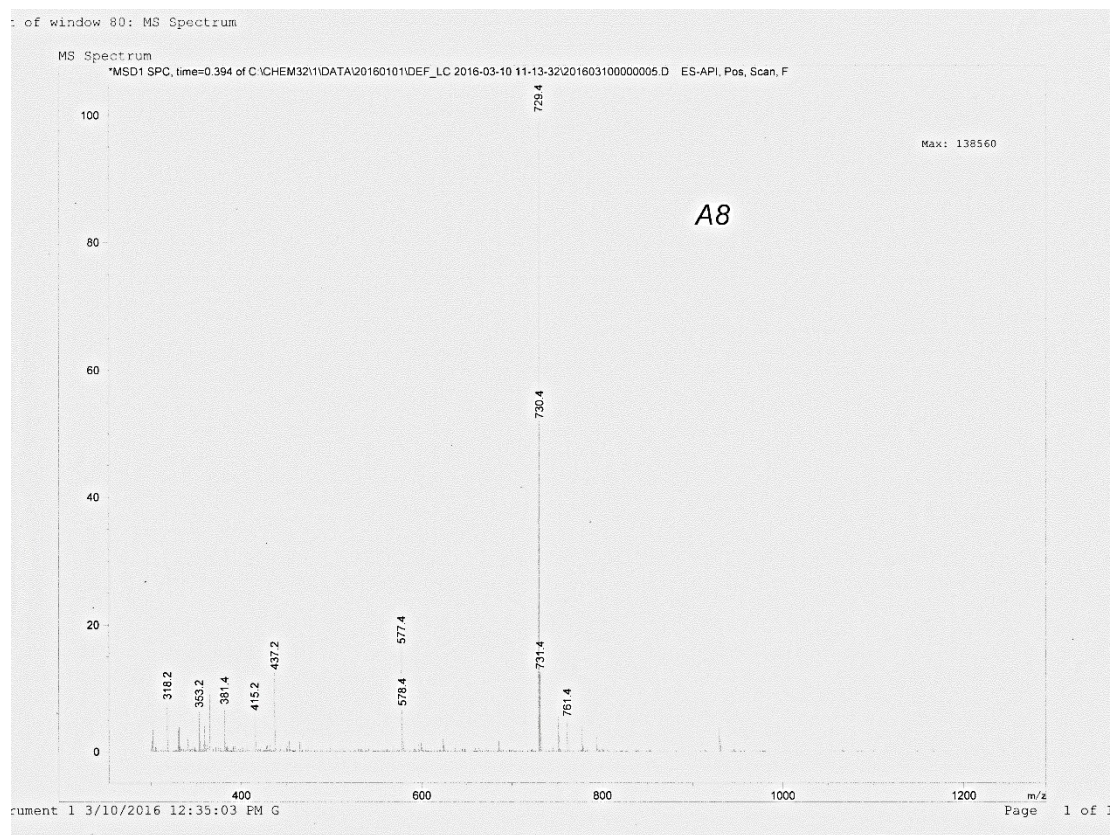

**Figure S53.** ESI-MS result of **13** at ambient temperature.

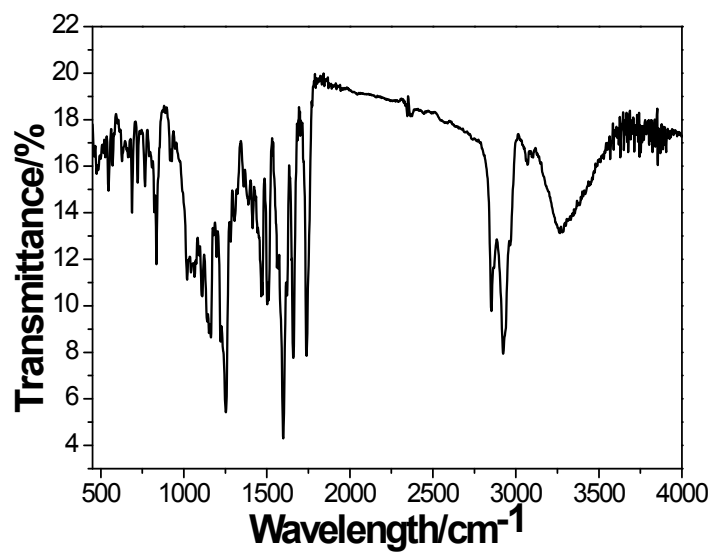

**Figure S54.** FT-IR spectrum of **13** in KBr tablet at ambient temperature.

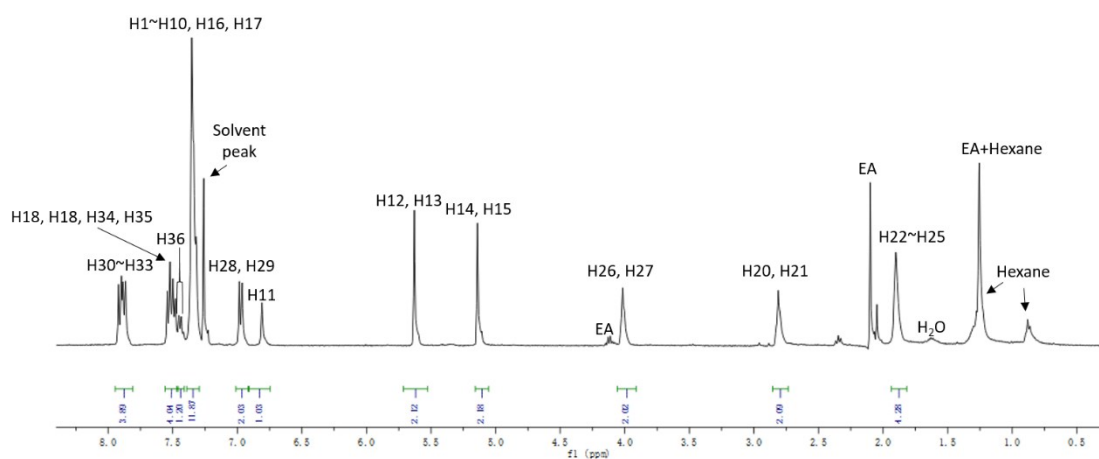

**Figure S55.**  $^1\text{H}$  NMR spectrum of *azo-phenytoin* in  $\text{CDCl}_3$  at ambient temperature.

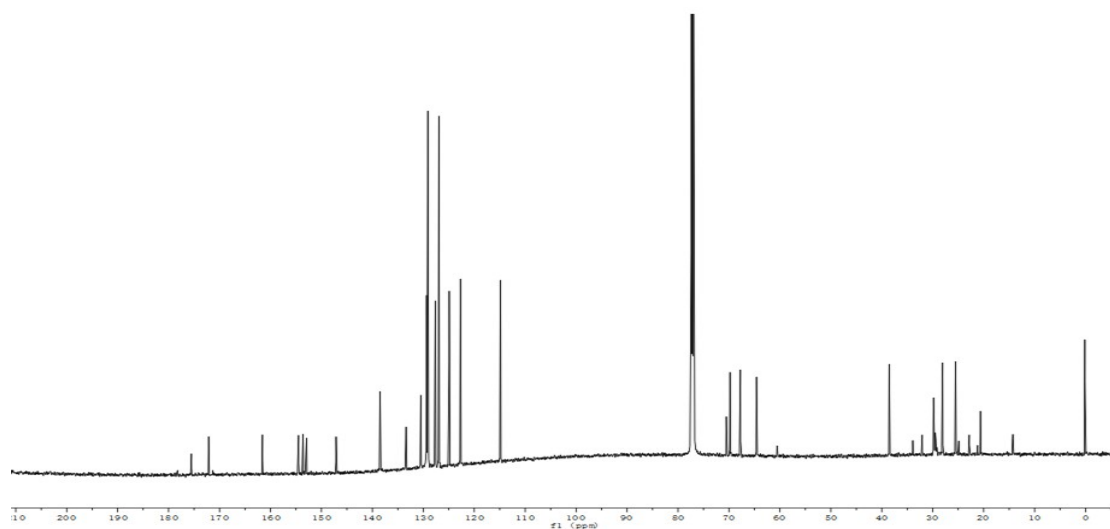

**Figure S56.**  $^{13}\text{C}$  NMR spectrum of *azo-phenytoin* in  $\text{CDCl}_3$  at ambient temperature (with residual ethyl acetate and hexane).

int of window 80: MS Spectrum

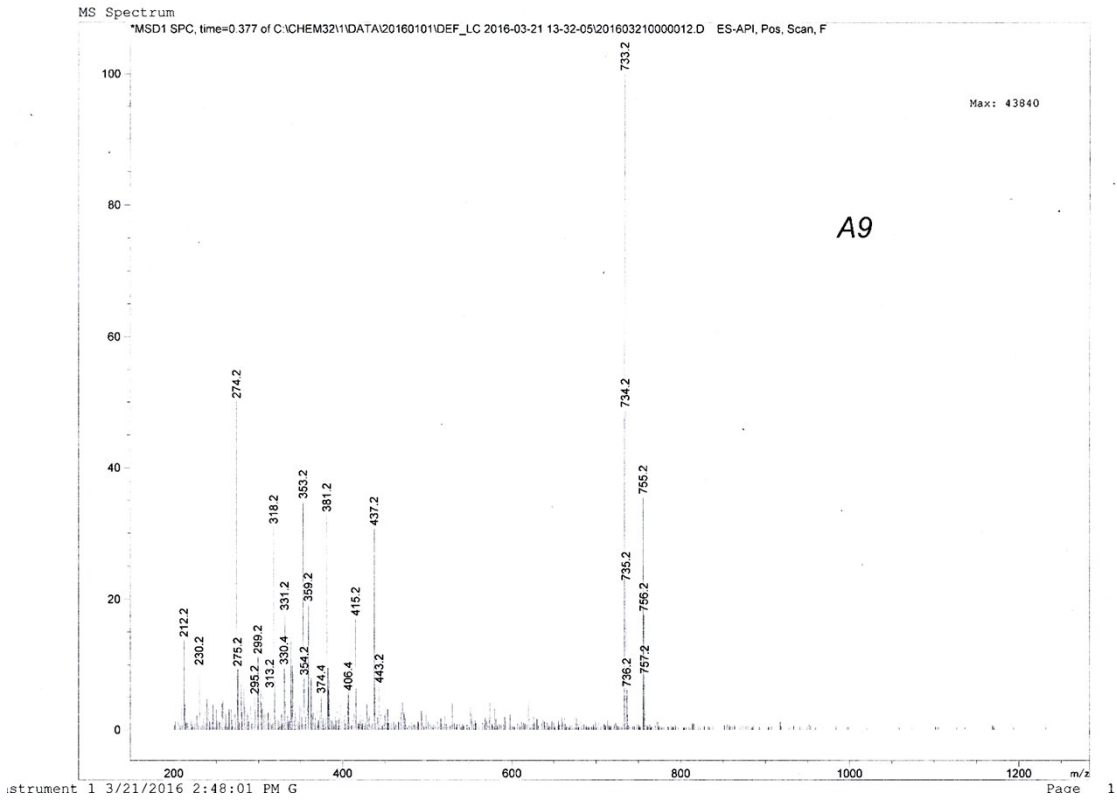

Figure S57. ESI-MS result of *azo-phenytoin* at ambient temperature.

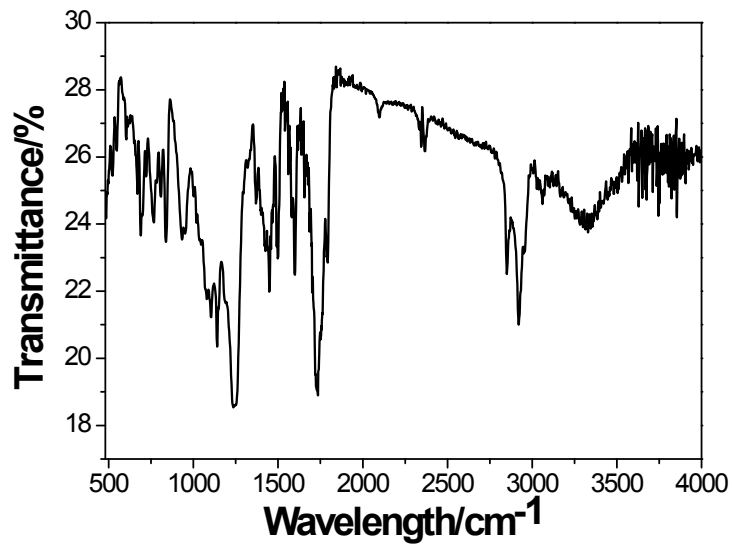

Figure S58. FT-IR spectrum of *azo-phenytoin* in KBr tablet at ambient temperature.

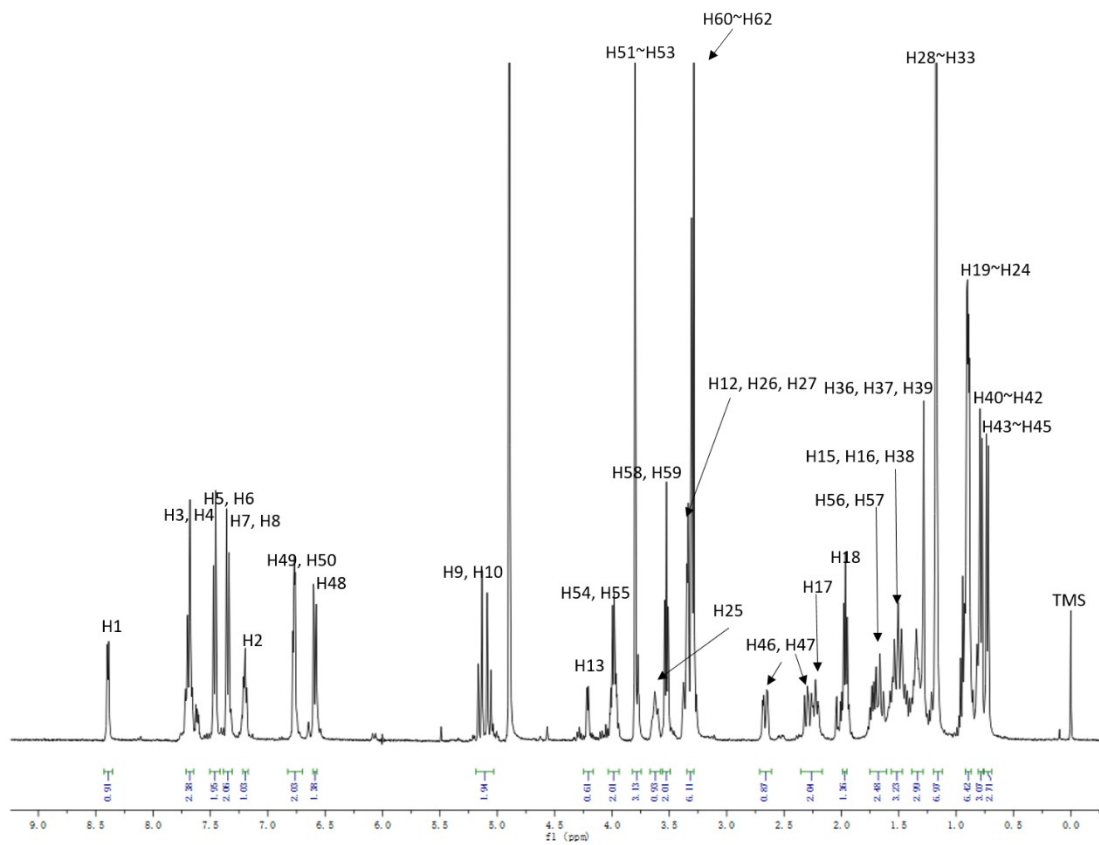

**Figure S59.**  $^1\text{H}$  NMR spectrum of **11** in  $\text{CDCl}_3$  at ambient temperature.



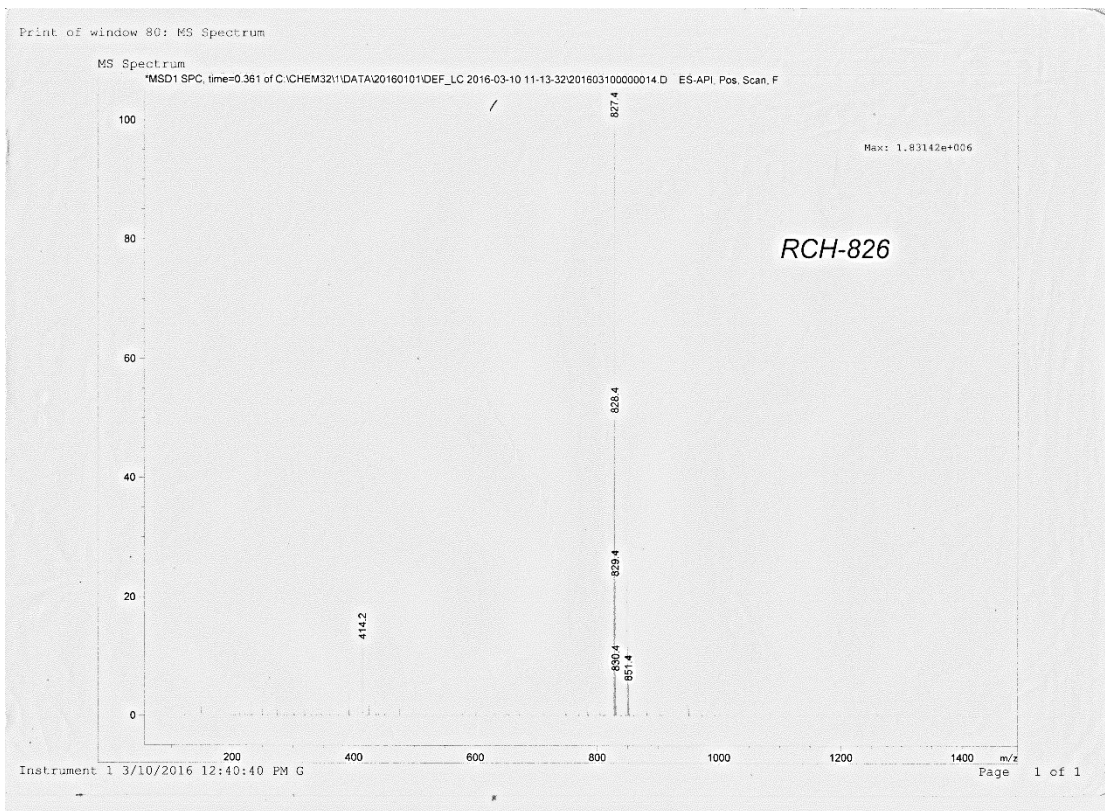

**Figure S60.** ESI-MS result of **11** at ambient temperature.



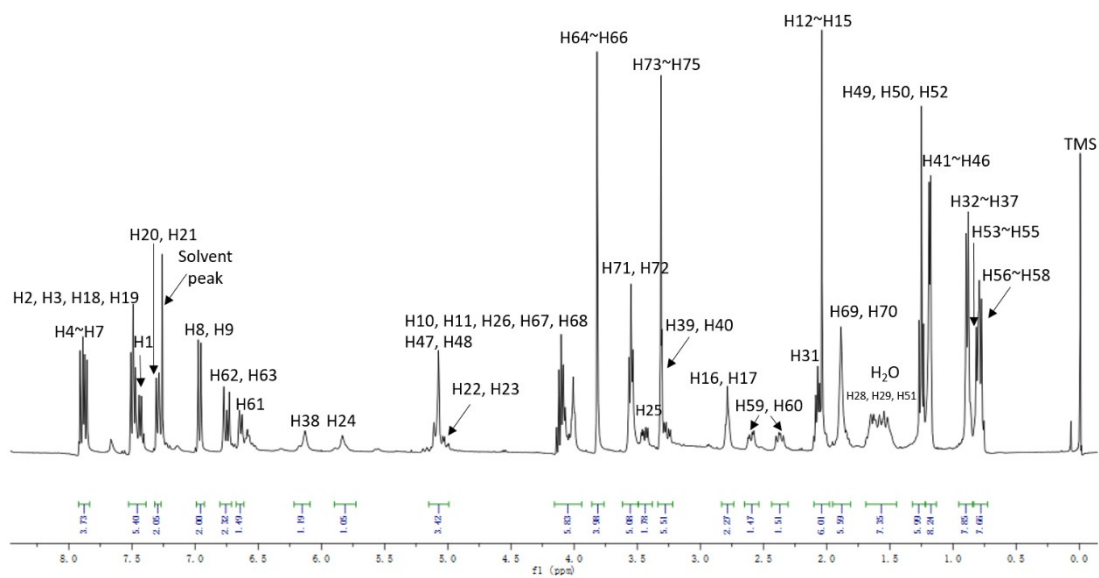

**Figure S61.** <sup>1</sup>H NMR spectrum of *azo-aliskiren* in CDCl<sub>3</sub> at ambient temperature.

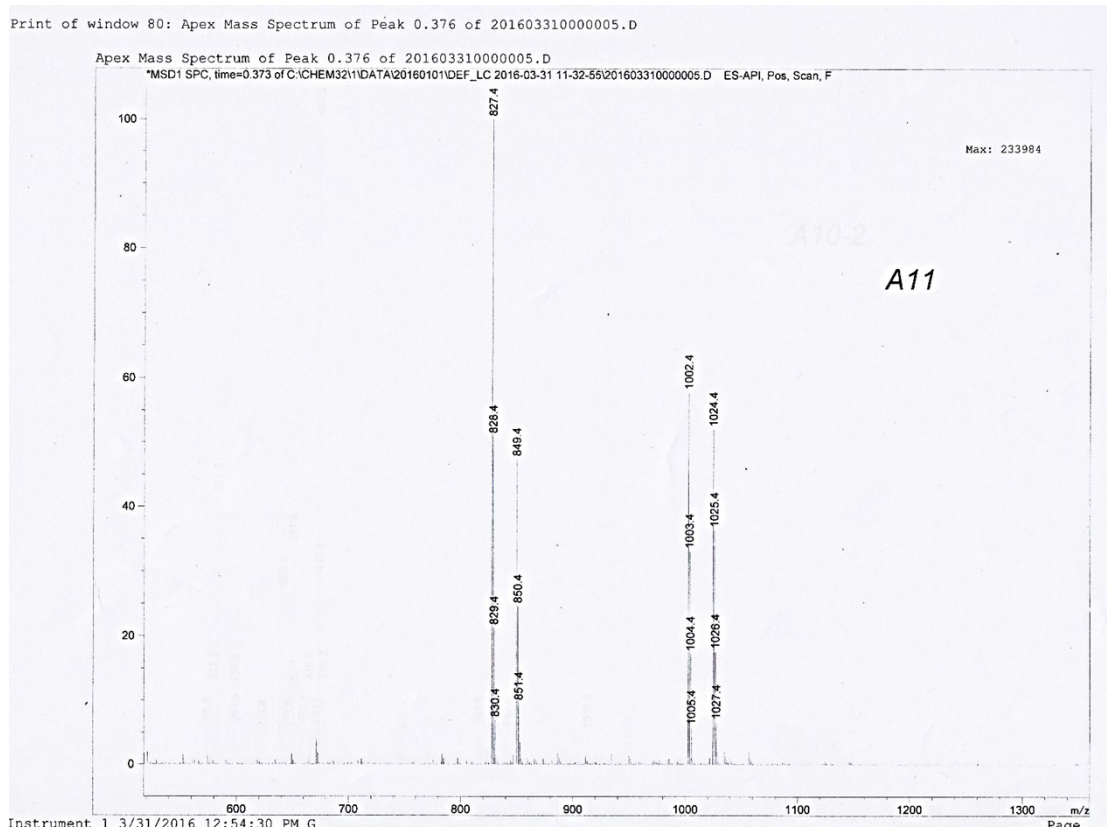

Figure S62. ESI-MS result of *azo-aliskiren* at ambient temperature.

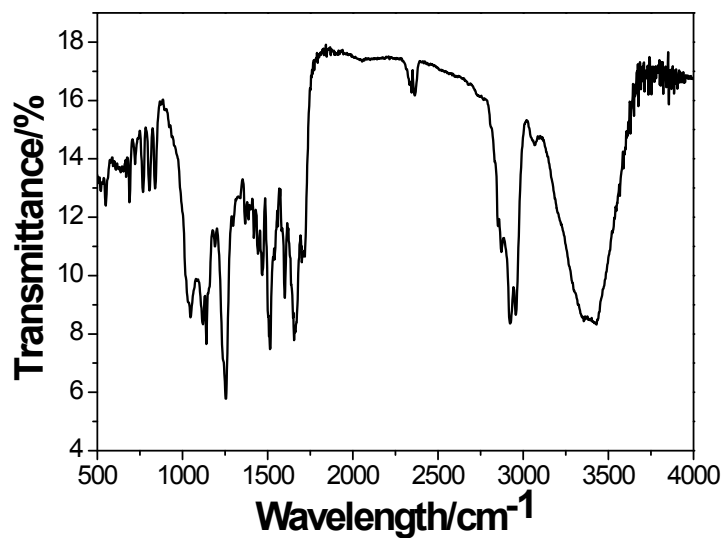

Figure S63. FT-IR spectrum of *azo-aliskiren* in KBr tablet at ambient temperature.

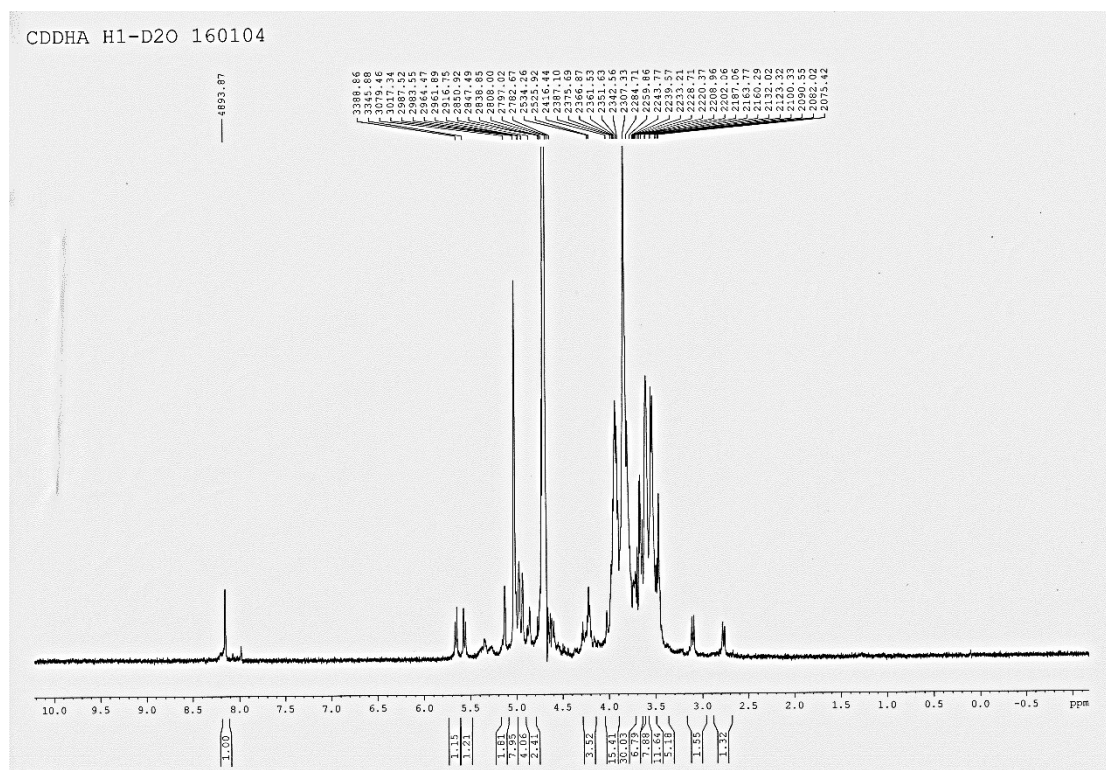

**Figure S64.**  $^1\text{H}$  NMR spectrum (600 MHz) of **DHA- $\beta$ -CD** in  $\text{D}_2\text{O}$  at ambient temperature.

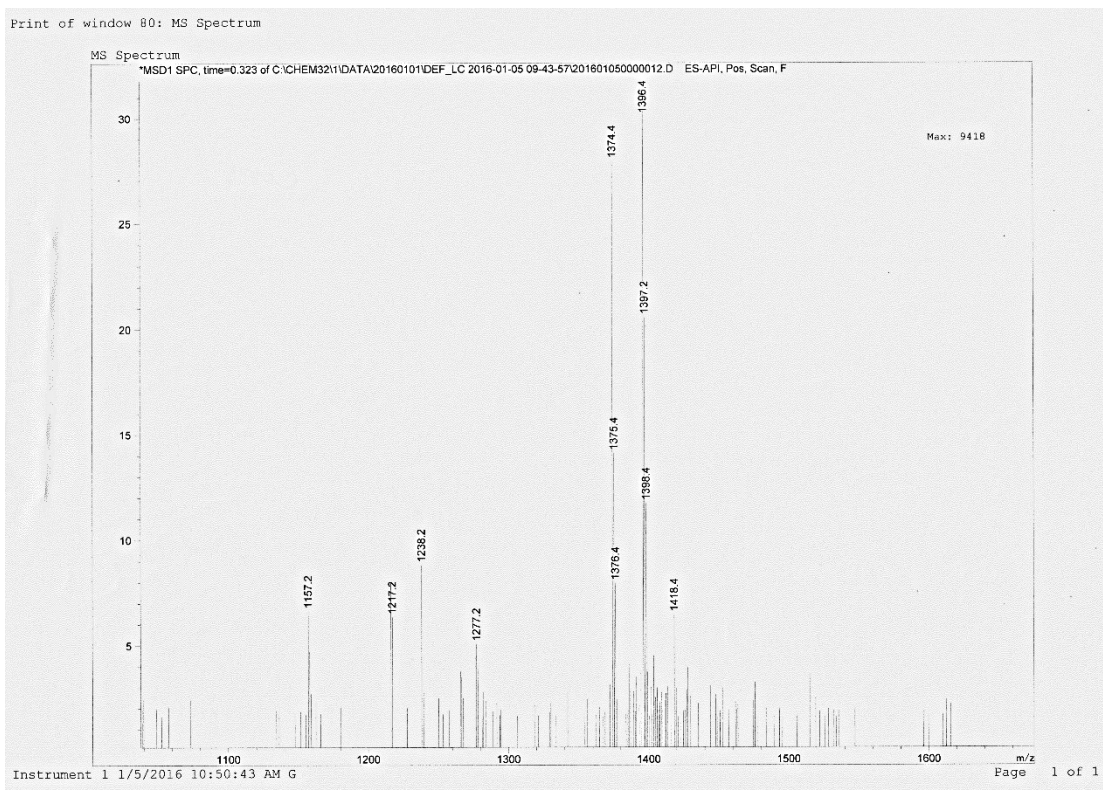

**Figure S65.** ESI-MS result of **DHA- $\beta$ -CD** at ambient temperature.

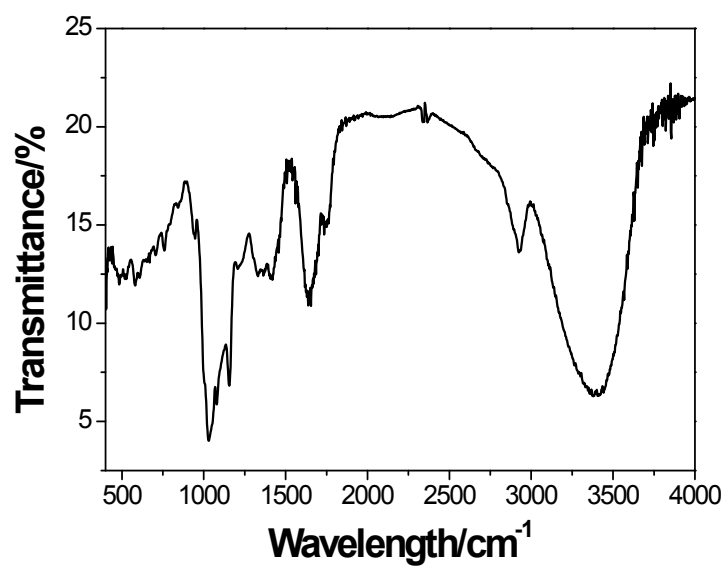

**Figure S66.** FT-IR spectrum of DHA-β-CD in KBr tablet at ambient temperature.

### 3. References of supporting information

1. Mahmoodi, N. O., Ghavidast, A., Mirkhaef, S. & Zanjanchi, M. A. Photochromism of azobenzene-thiol-1,3-diazabicyclo-[3.1.0]hex-3-ene on silver nanoparticles. *Dyes Pigments* 2015, **118**, 110–117.
2. Sun, T., Morger, A., Castagner, B. & Leroux, J.-C. An oral redox-sensitive self-immolating prodrug strategy. *Chem. Commun.* 2015, **51**, 5721–5724.
3. Tang, W. H., Ng, S. C. Facile synthesis of mono-6-amino-6-deoxy- $\alpha$ -,  $\beta$ -,  $\gamma$ -cyclodextrin hydrochlorides for molecular recognition, chiral separation and drug delivery. *Nat. Protoc.* 2008, **3** (4), 691–697.
4. Guo, Y., Zhang, Y., Li, J., Zhang, Y., Lu, Y., Jiang, X., He, X., Ma, H., An, S., Jiang, C. *ACS Appl. Mater. Interfaces* 2015, **7**, 5444–5453.
